# Supplementary material for: Synthesis of N-benzyl-N-phenylthiophene-2-carboxamide analogues as a novel class of enterovirus 71 inhibitors
Source: Royal Society of Chemistry journal article supplement (doi:10.1039/c5ra07286g), 2015-01-01

## Supporting Information for

### **Synthesis of *N*-benzyl-*N*-phenylthiophene-2-carboxamide Analogues as a Novel Class of Human Enterovirus 71 Inhibitors**

Jiawei Pan,<sup>a,b,†</sup> Xin Han,<sup>b,†</sup> Ningyuan Sun,<sup>a</sup> Haoming Wu,<sup>a</sup> Dandan Lin,<sup>c</sup> Po Tien,<sup>a</sup> Haibing Zhou<sup>\*b</sup> and Shuwen Wu<sup>\*a</sup>

<sup>a</sup> College of Life Sciences, Wuhan University, Wuhan 430072, China

<sup>b</sup> Address, State Key Laboratory of Virology, Wuhan University School of Pharmaceutical Sciences, Wuhan 430071, China

<sup>c</sup> Department of Oncology, Renmin Hospital of Wuhan University, Wuhan 430060, China

# NMR Spectra of 5a-n and 10a-t

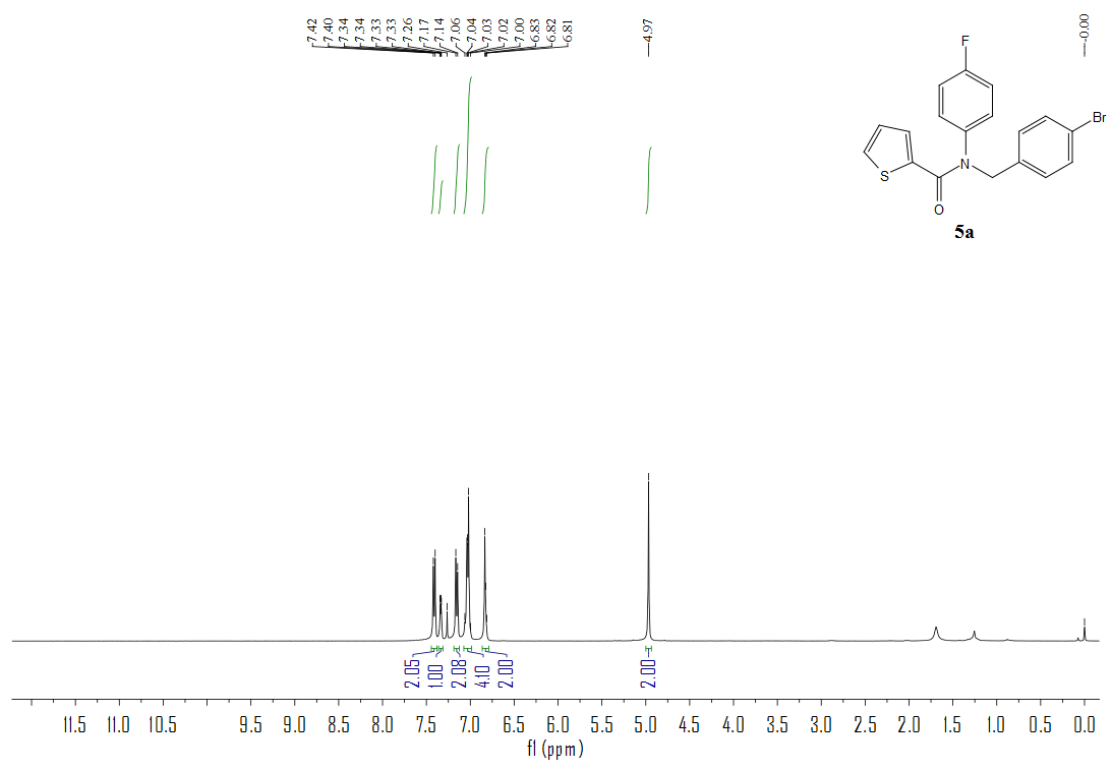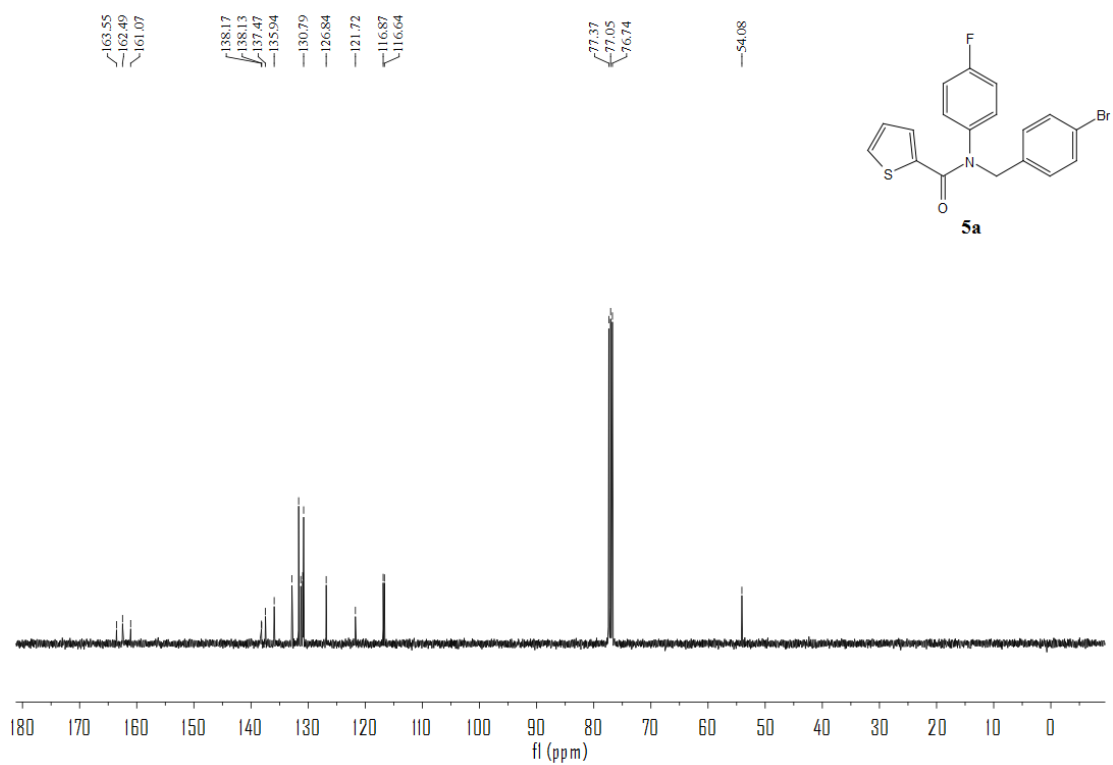

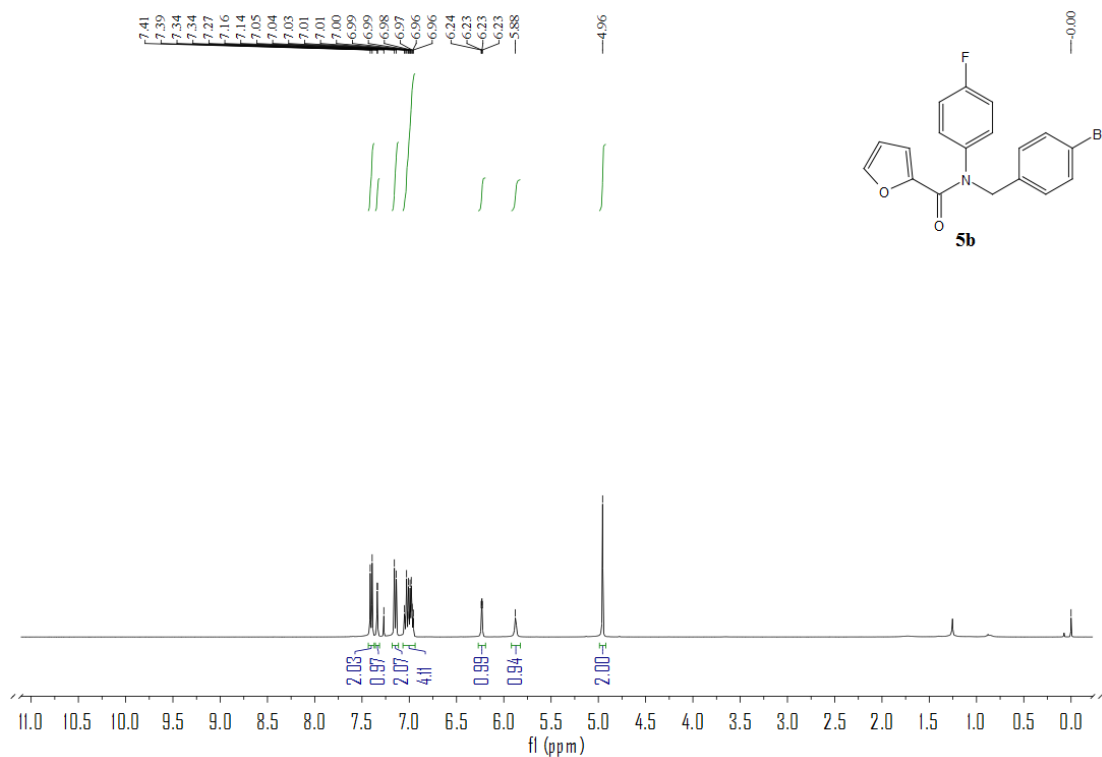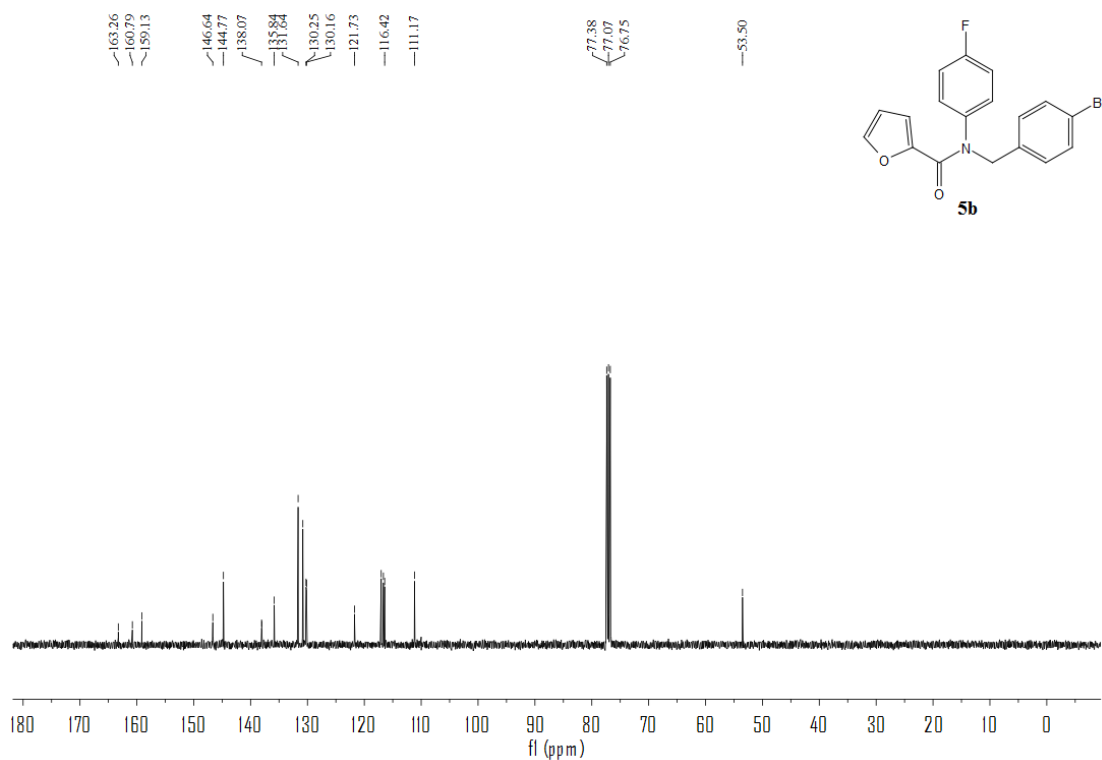

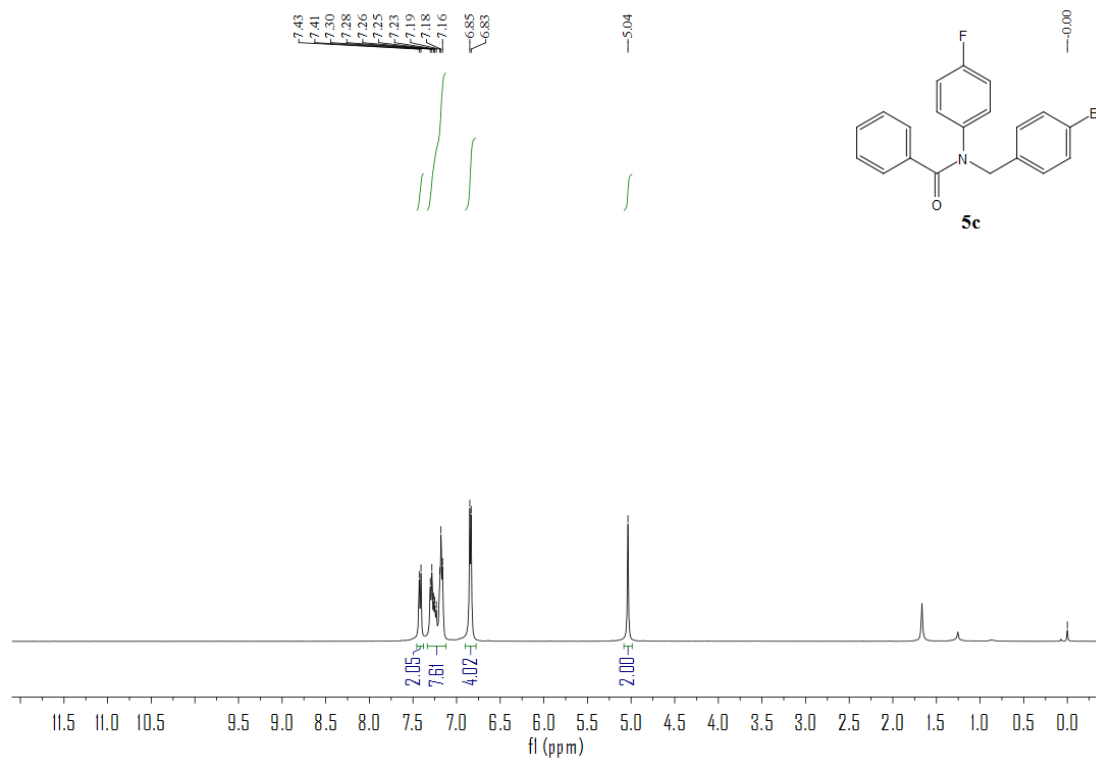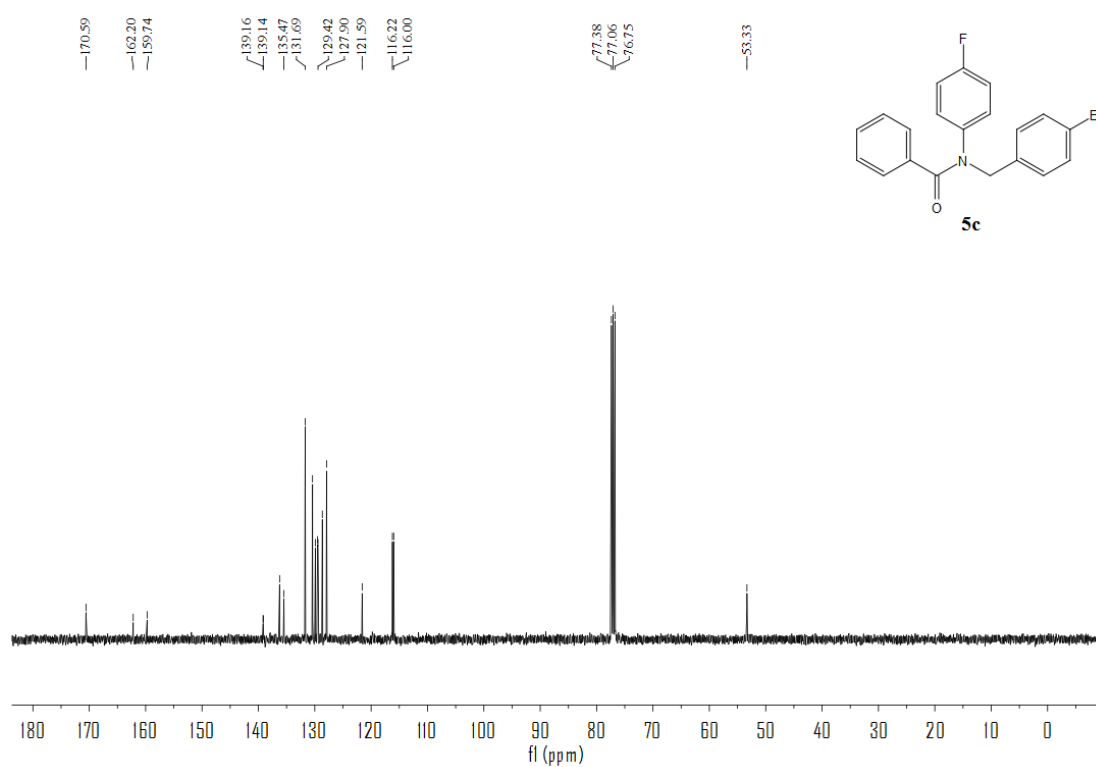

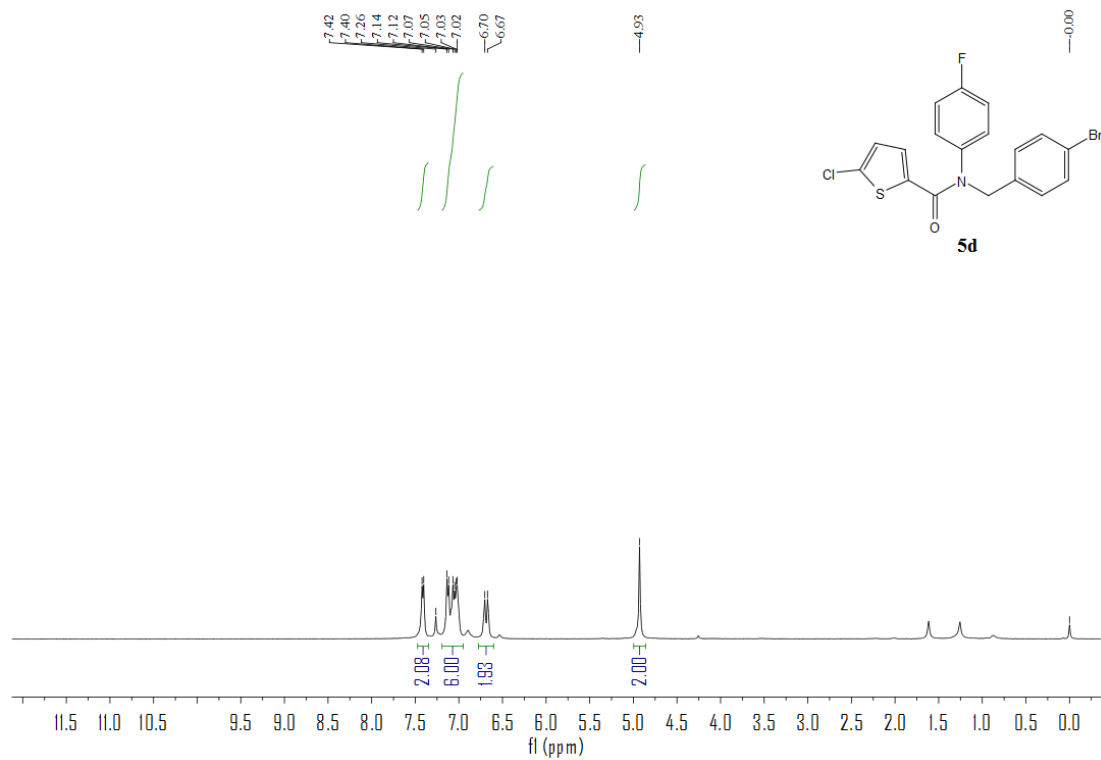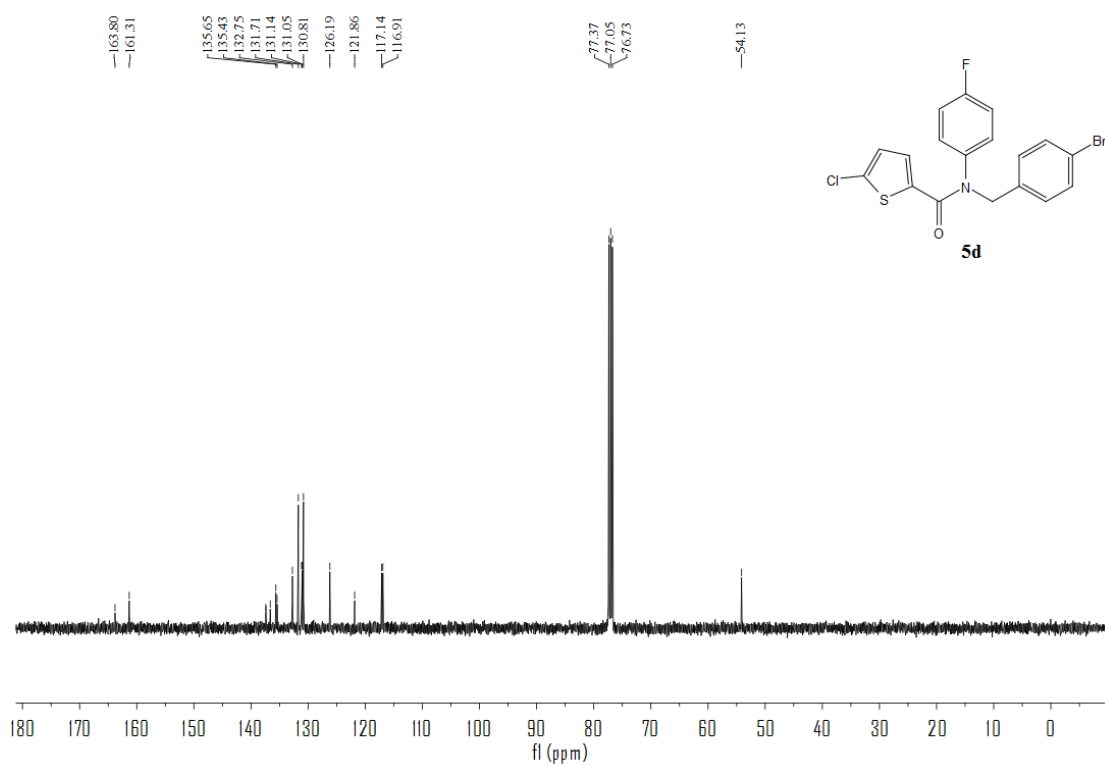

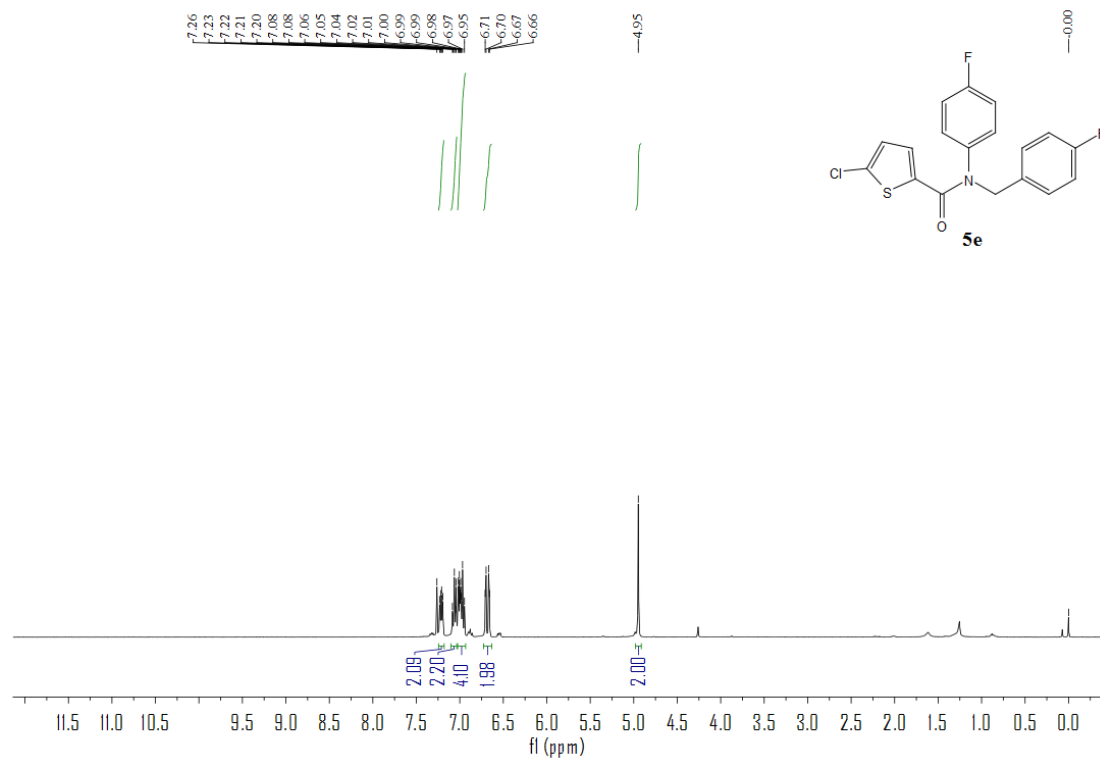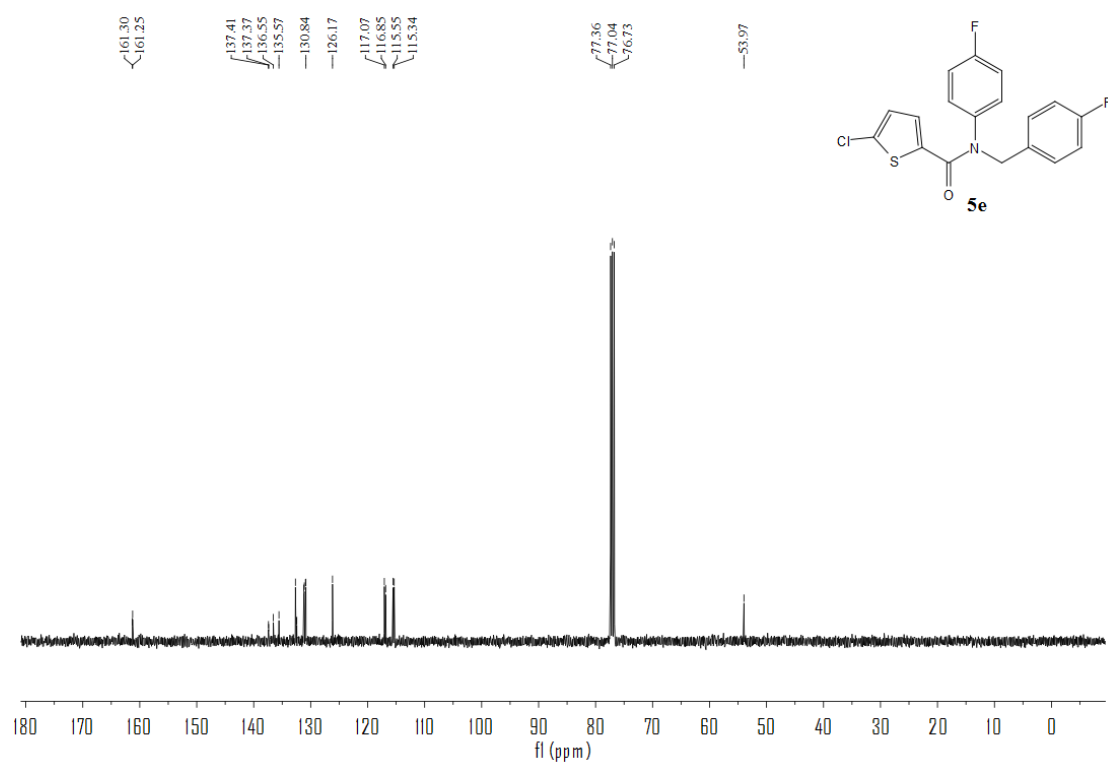

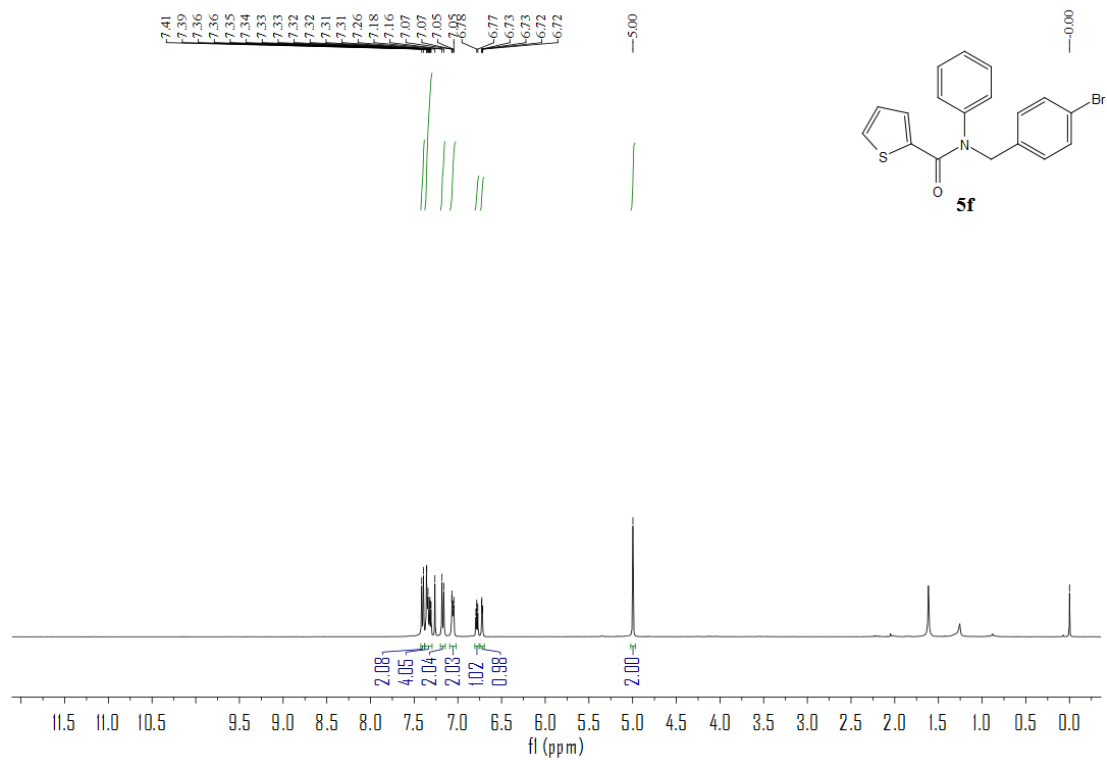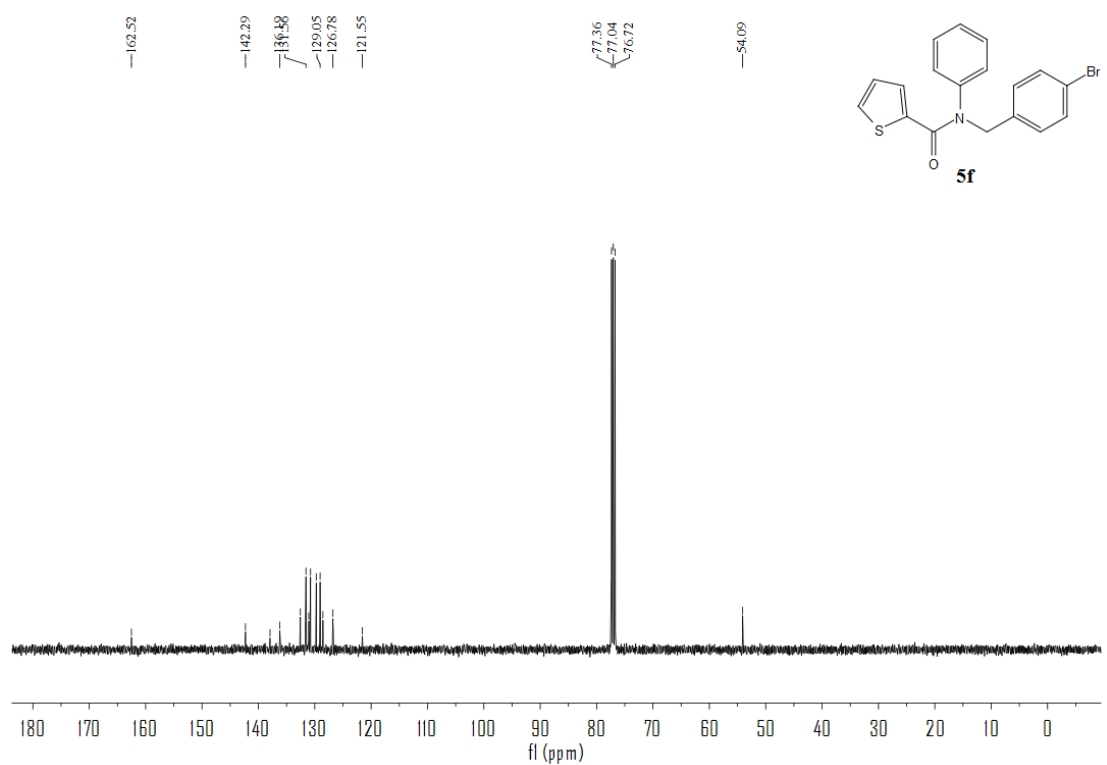

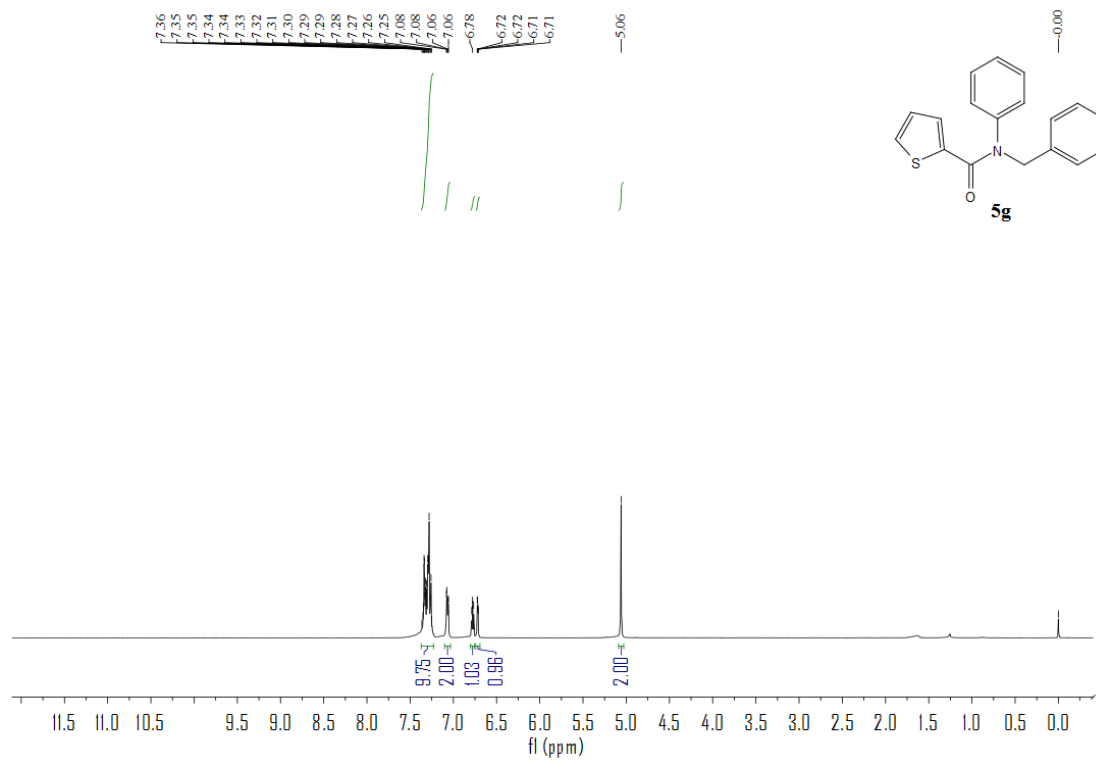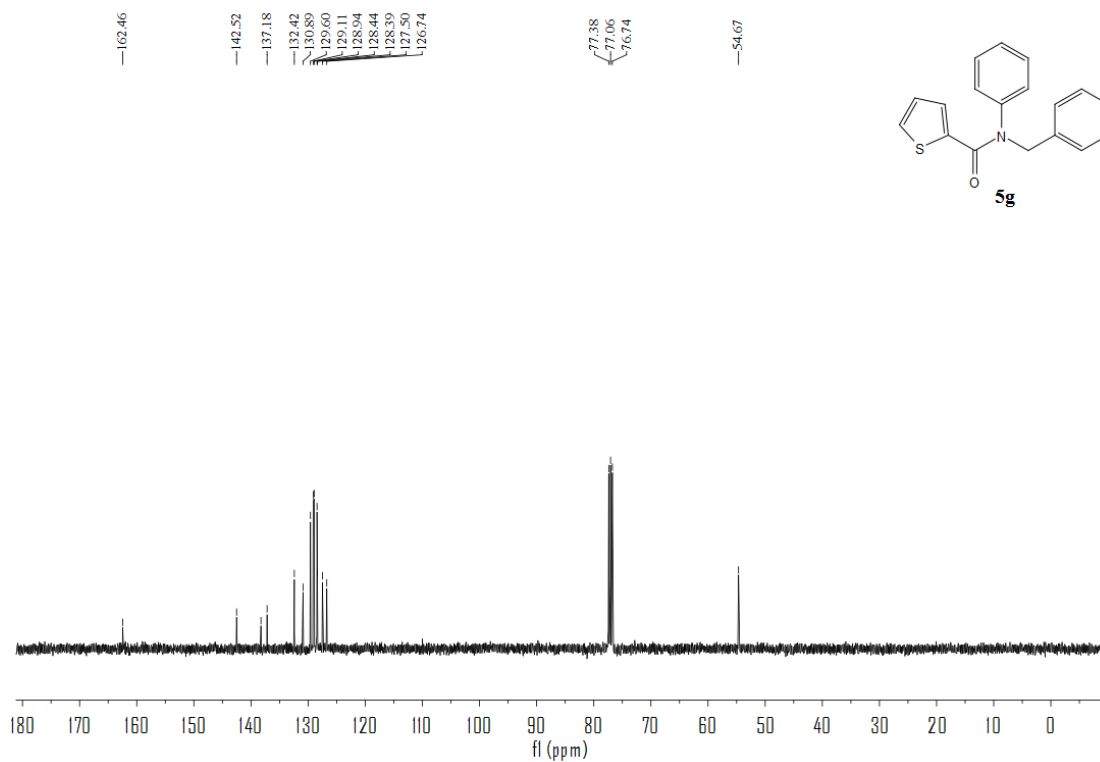



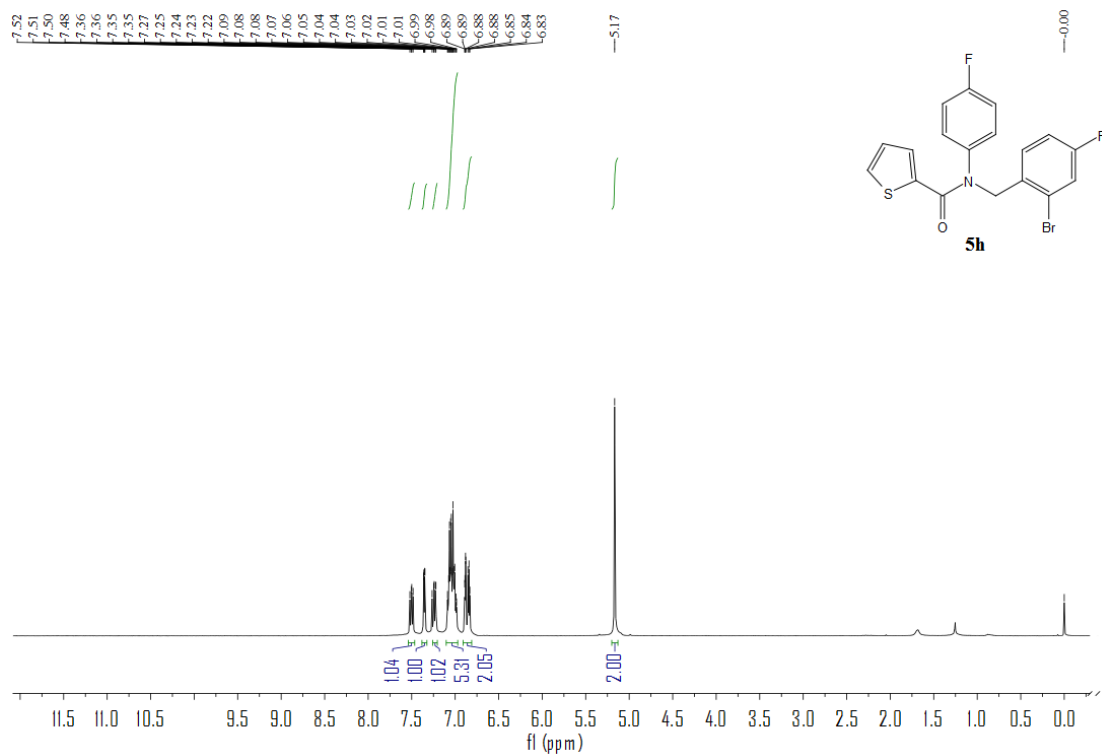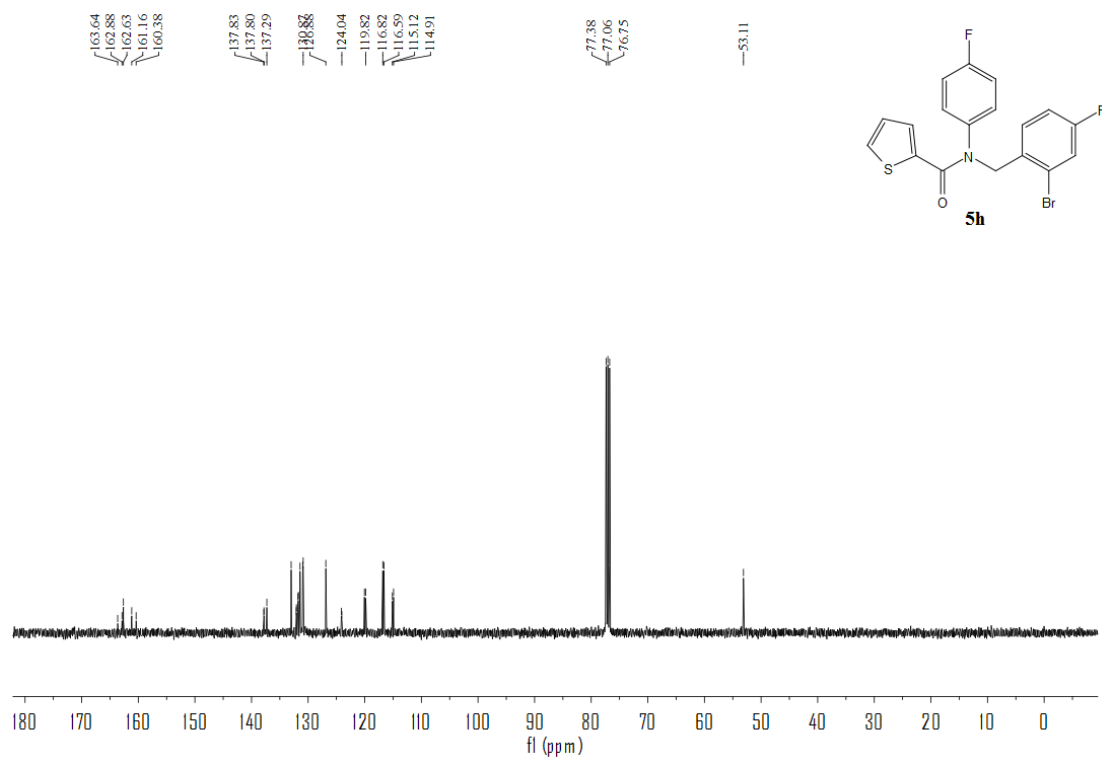

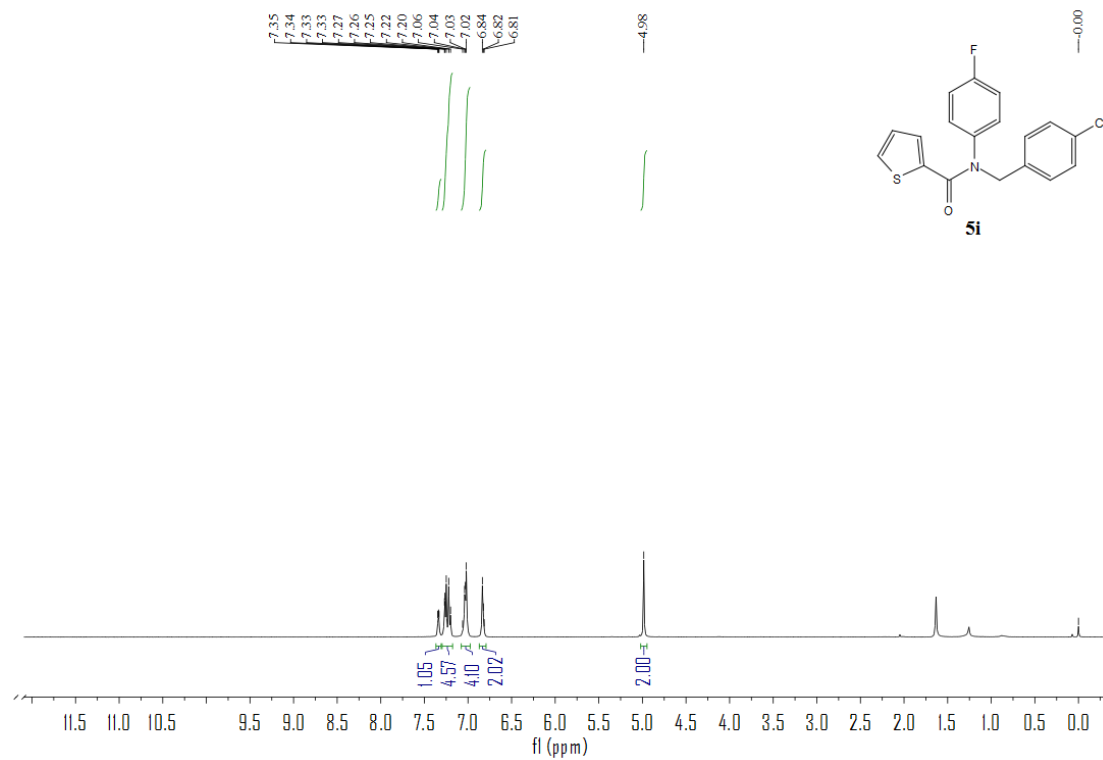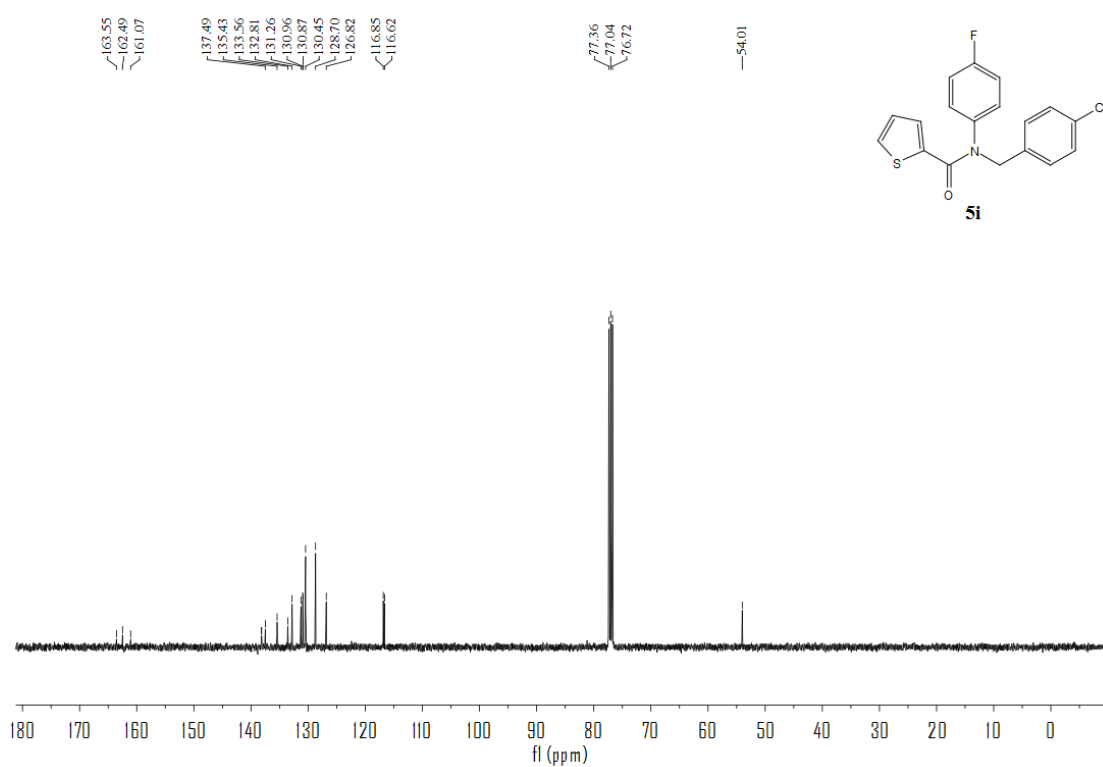

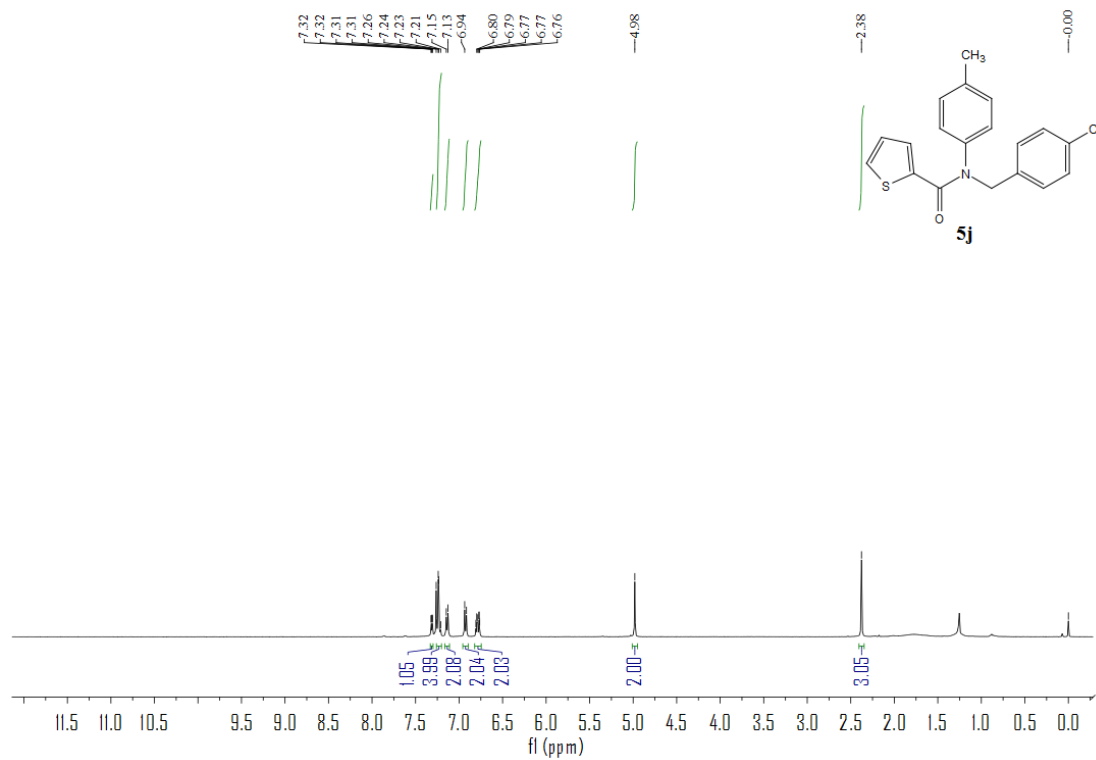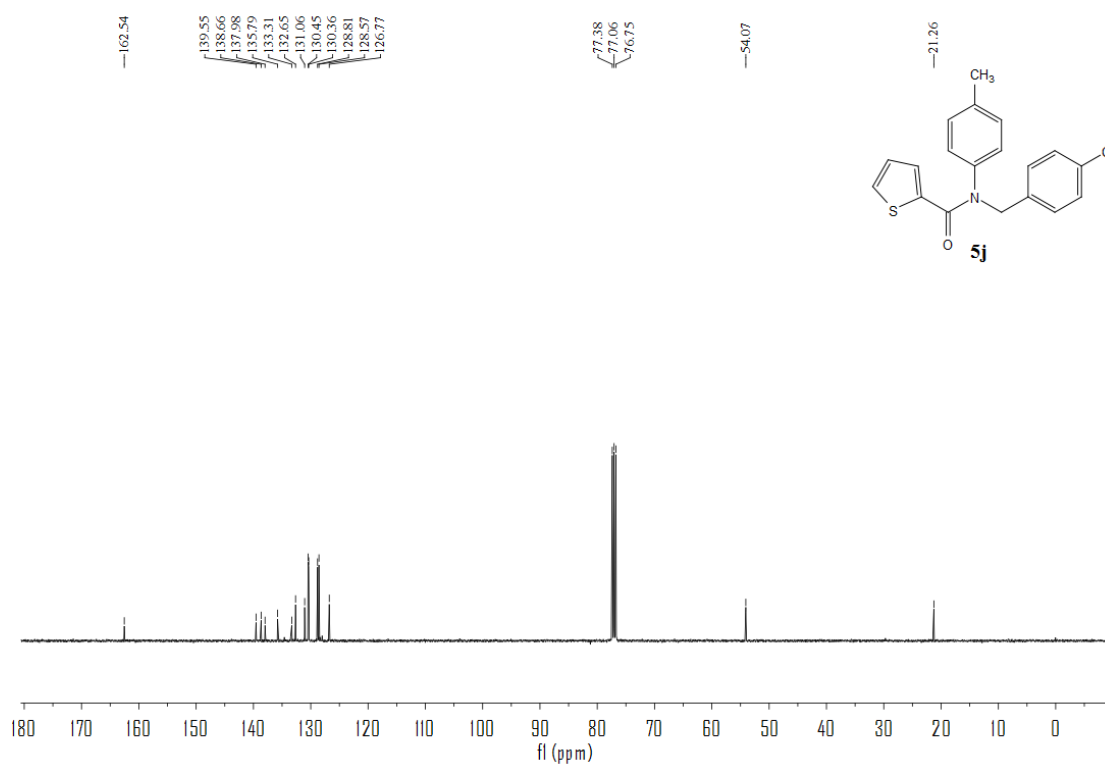

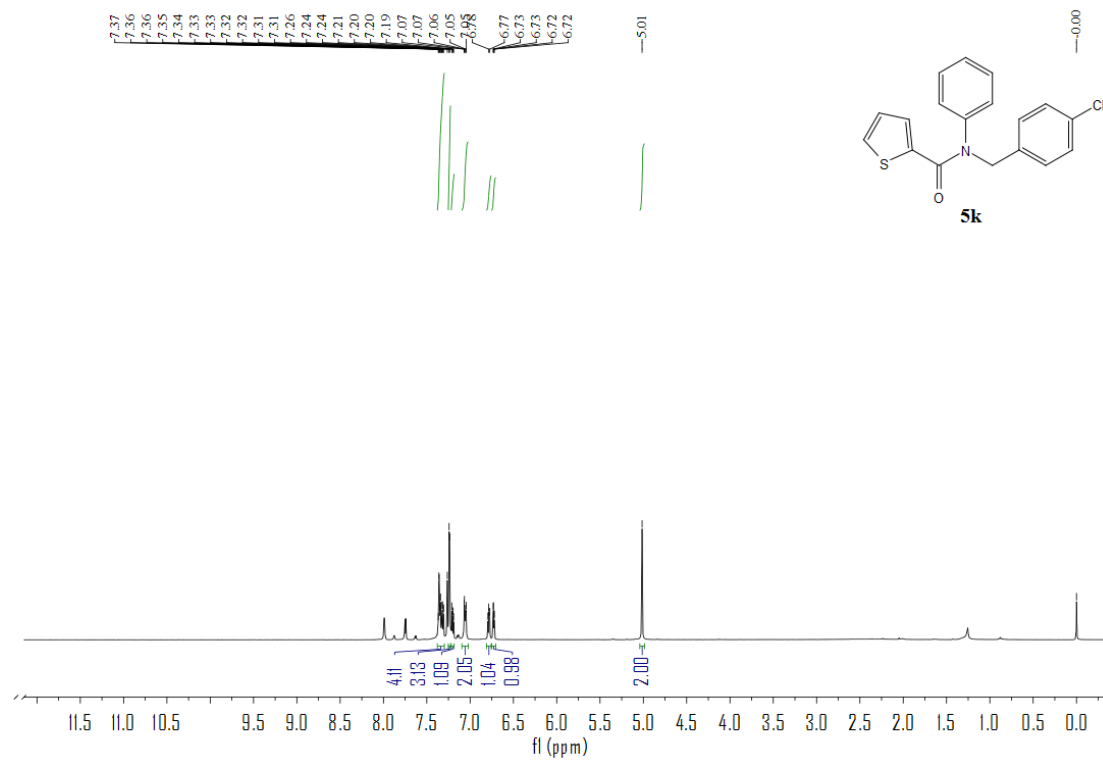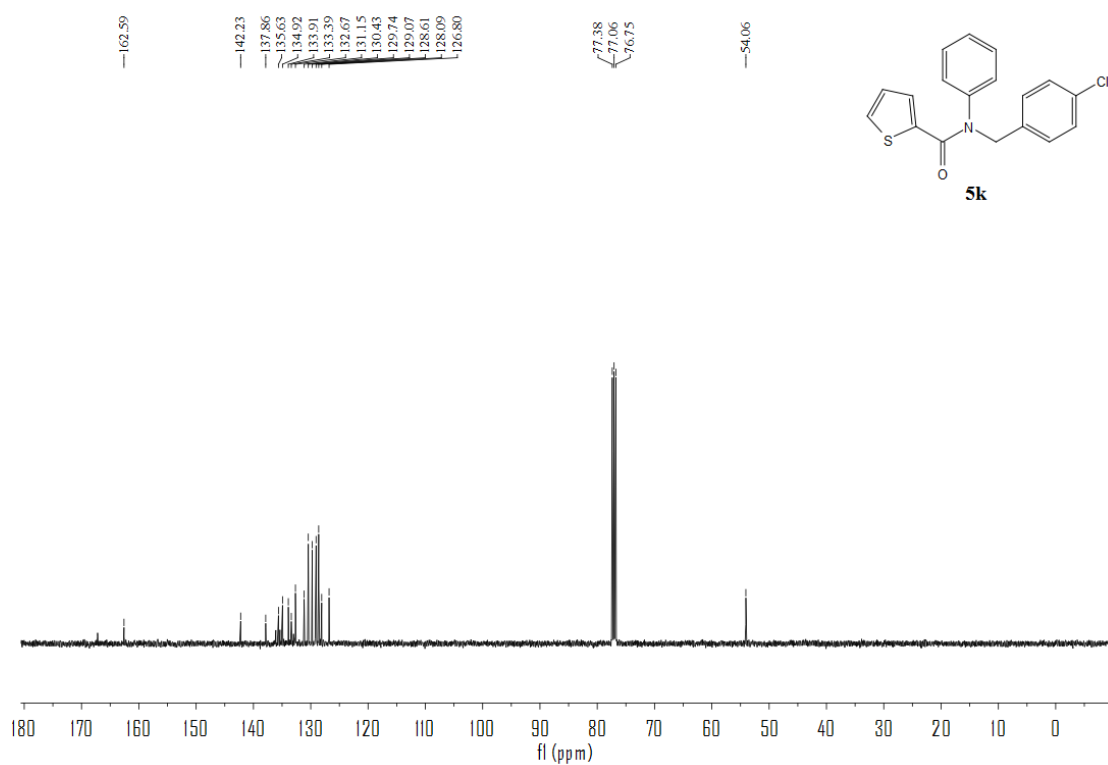

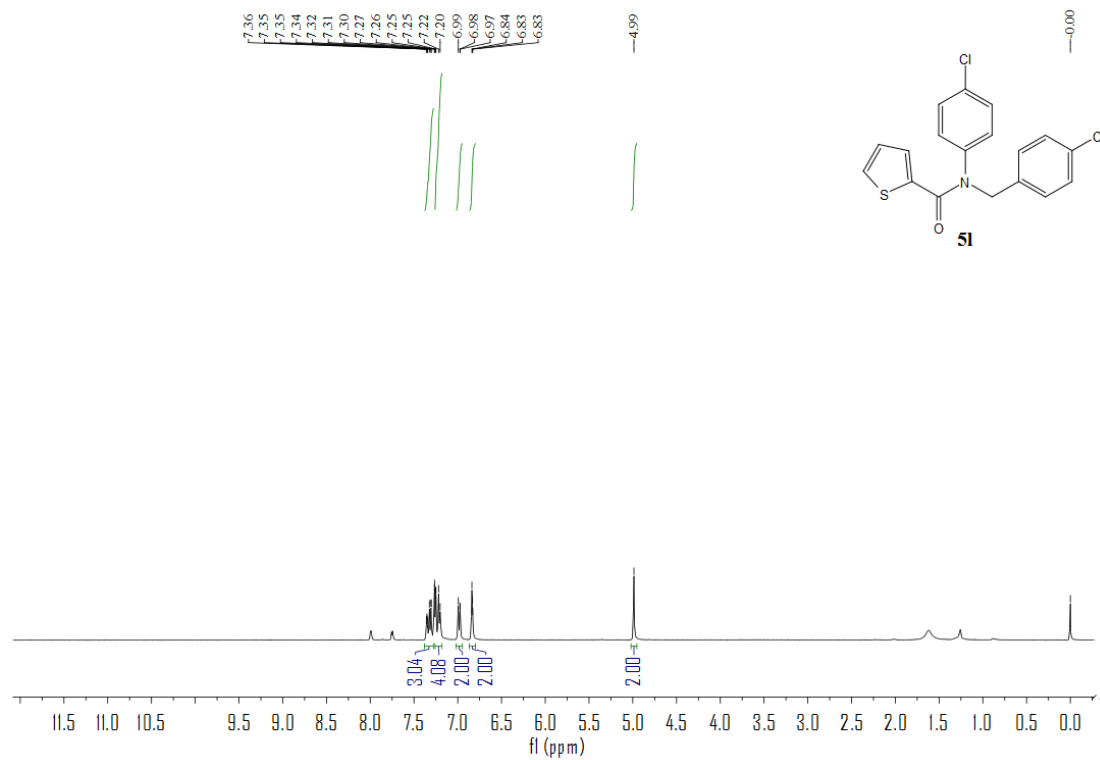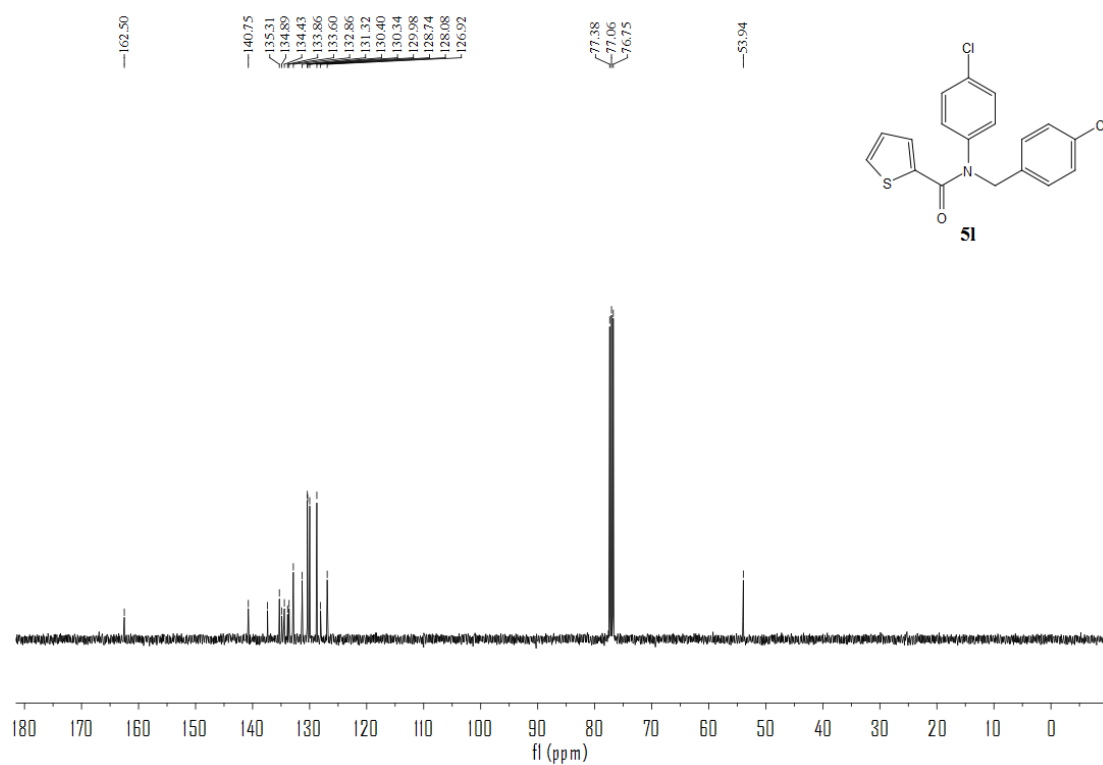

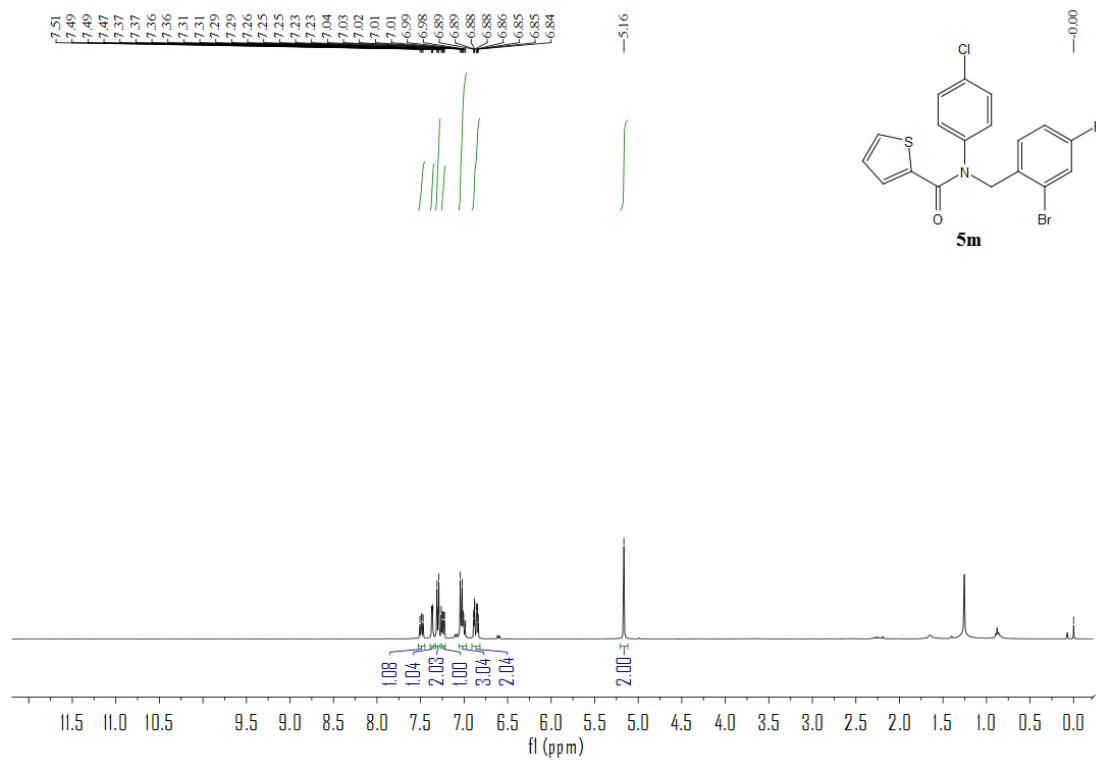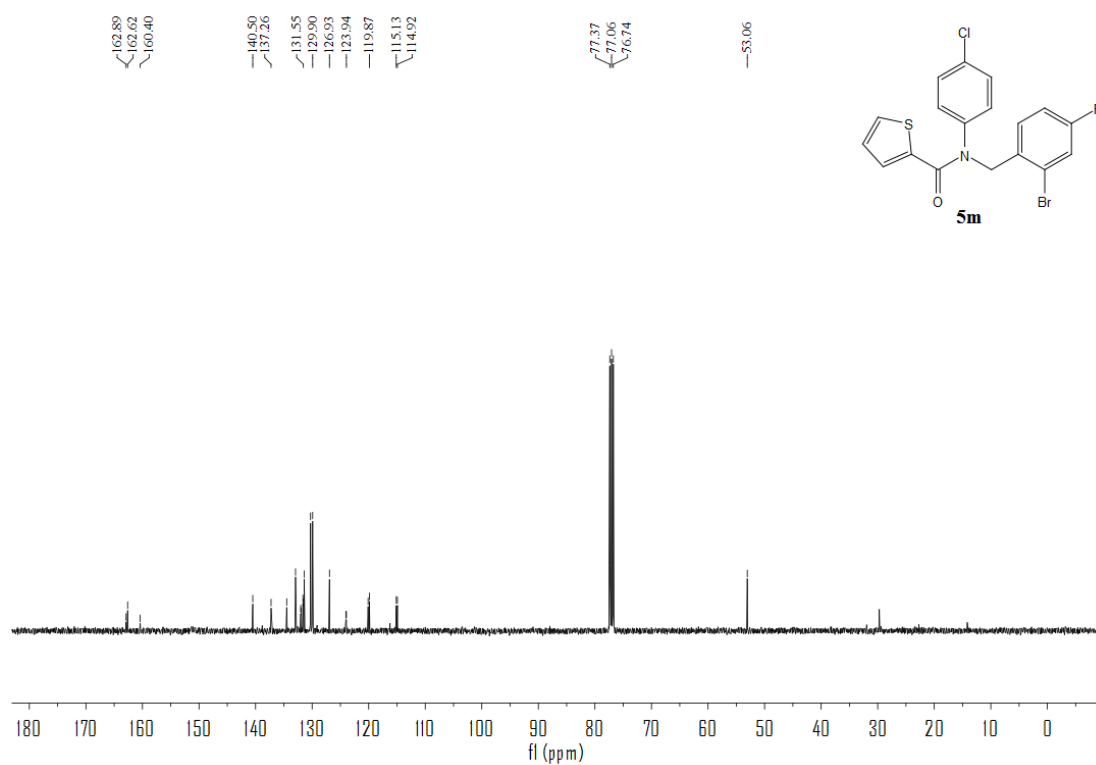

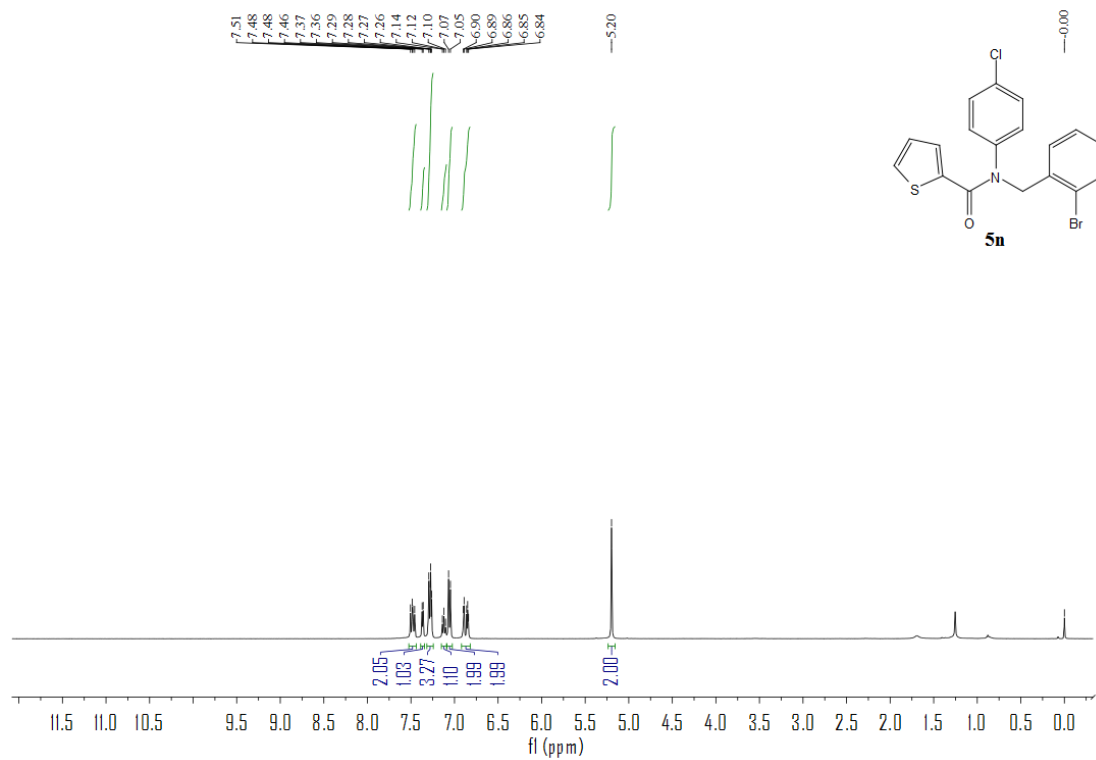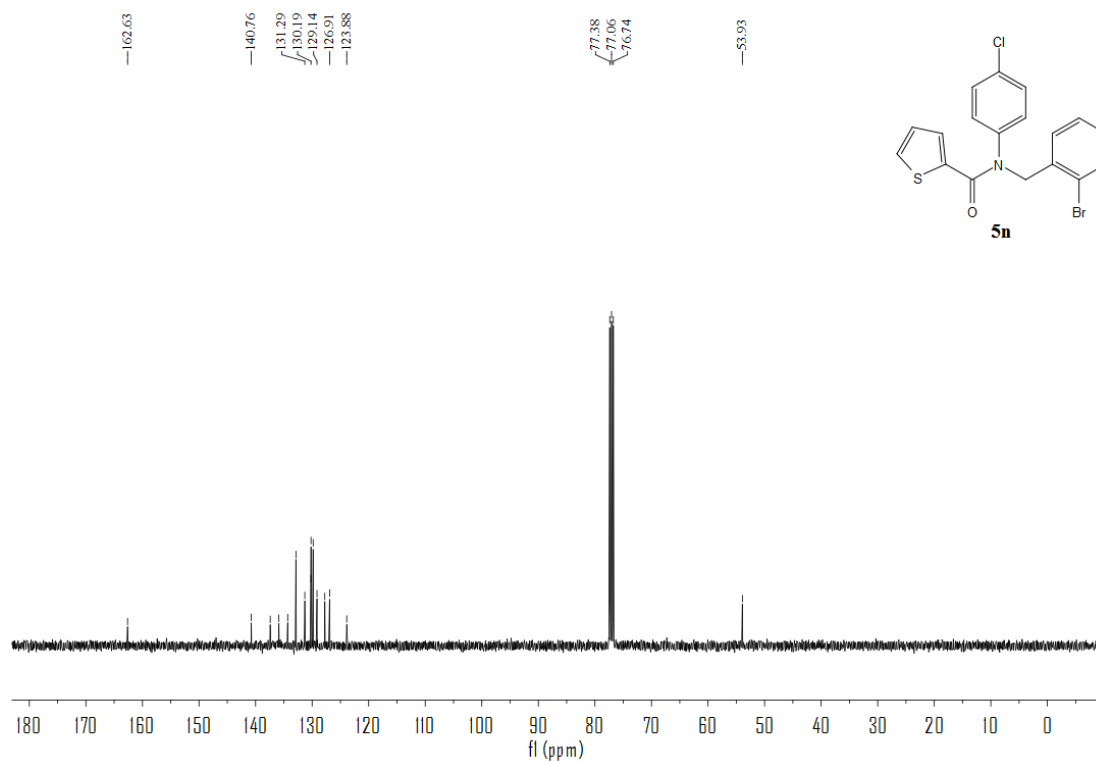

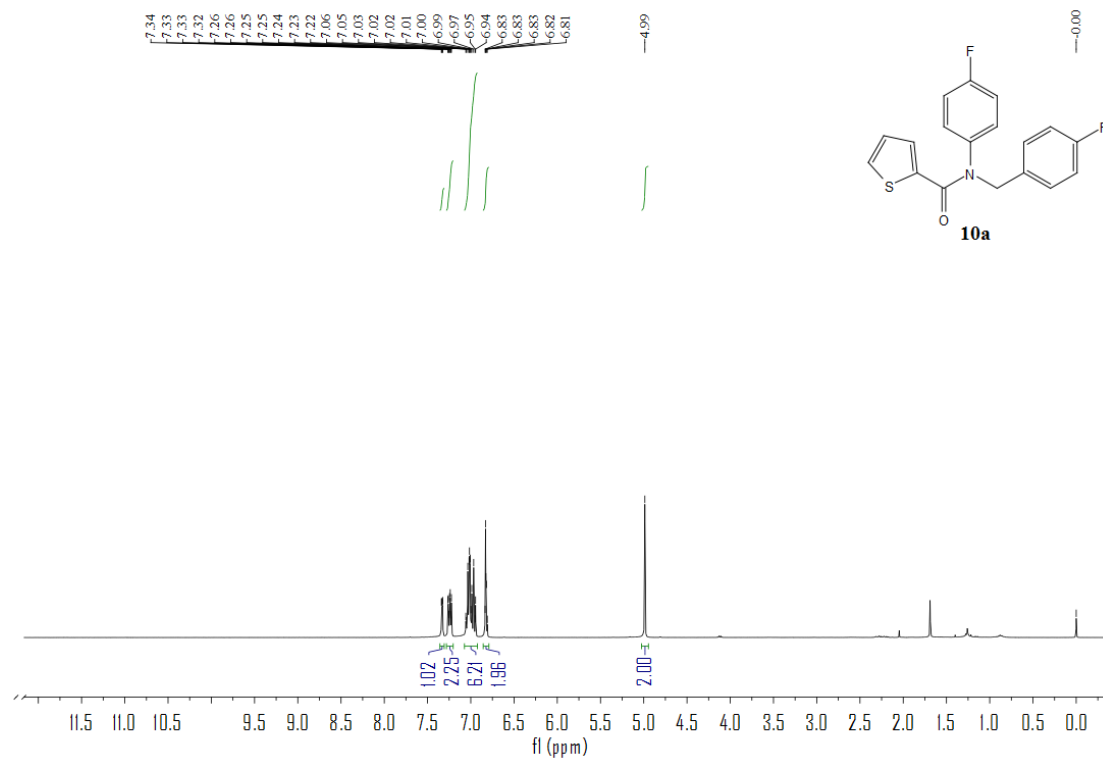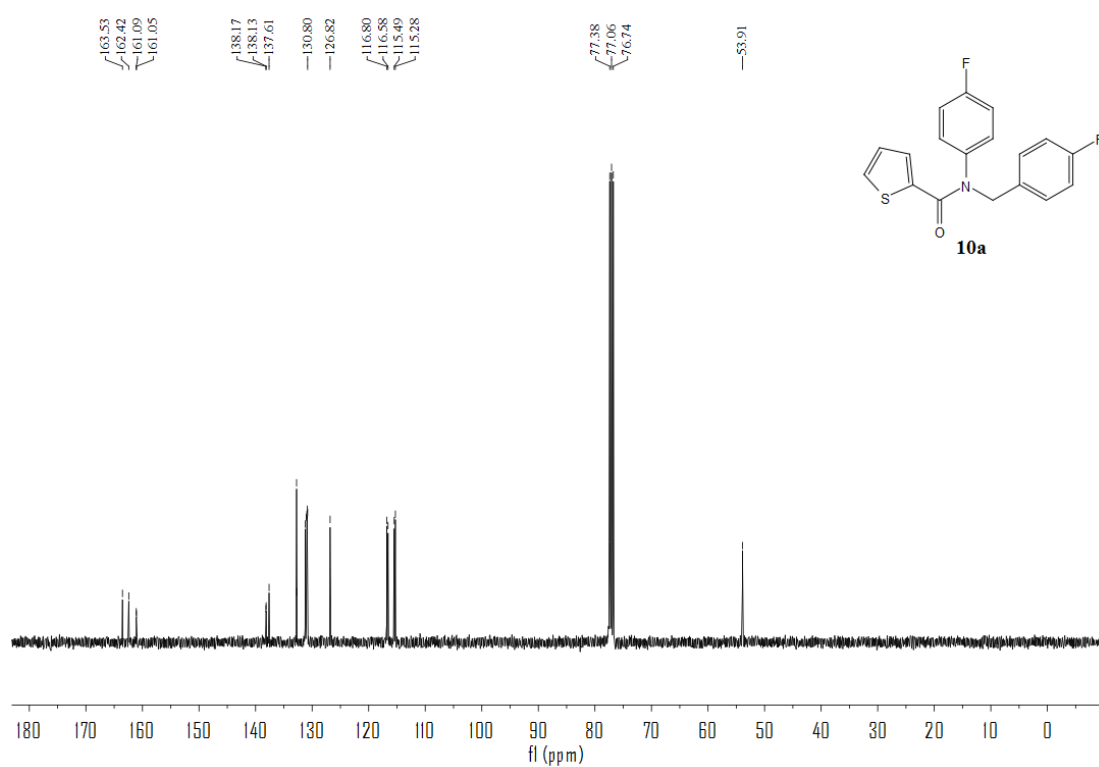



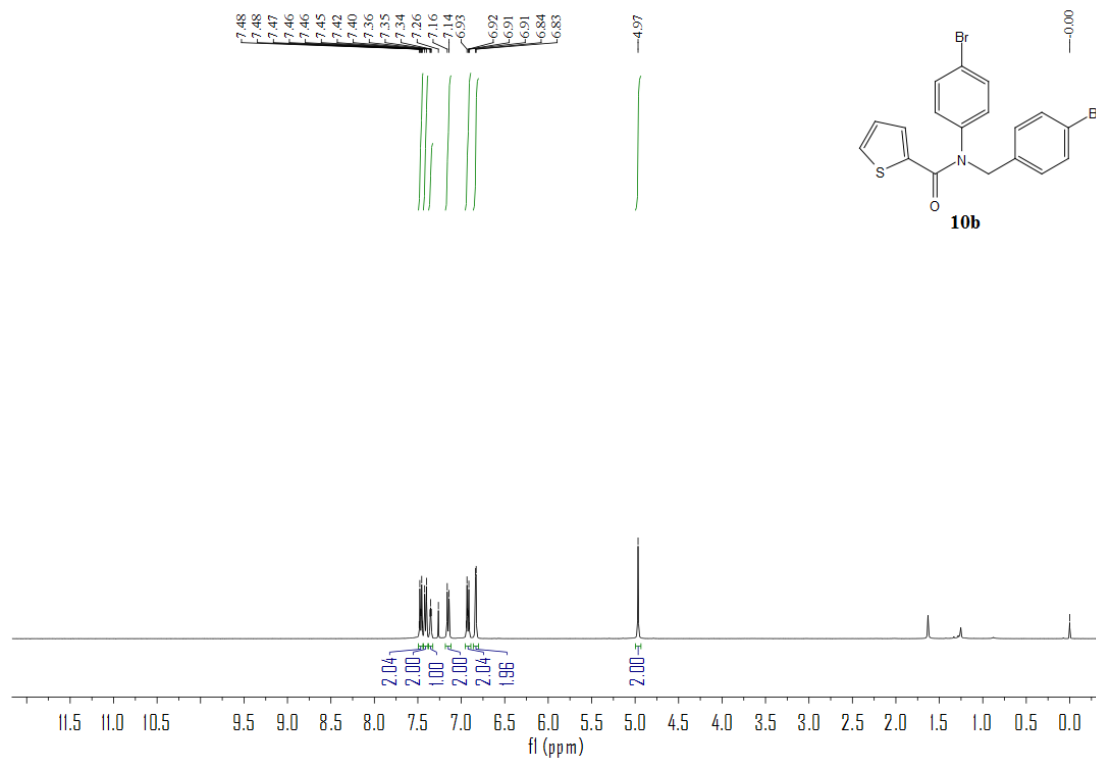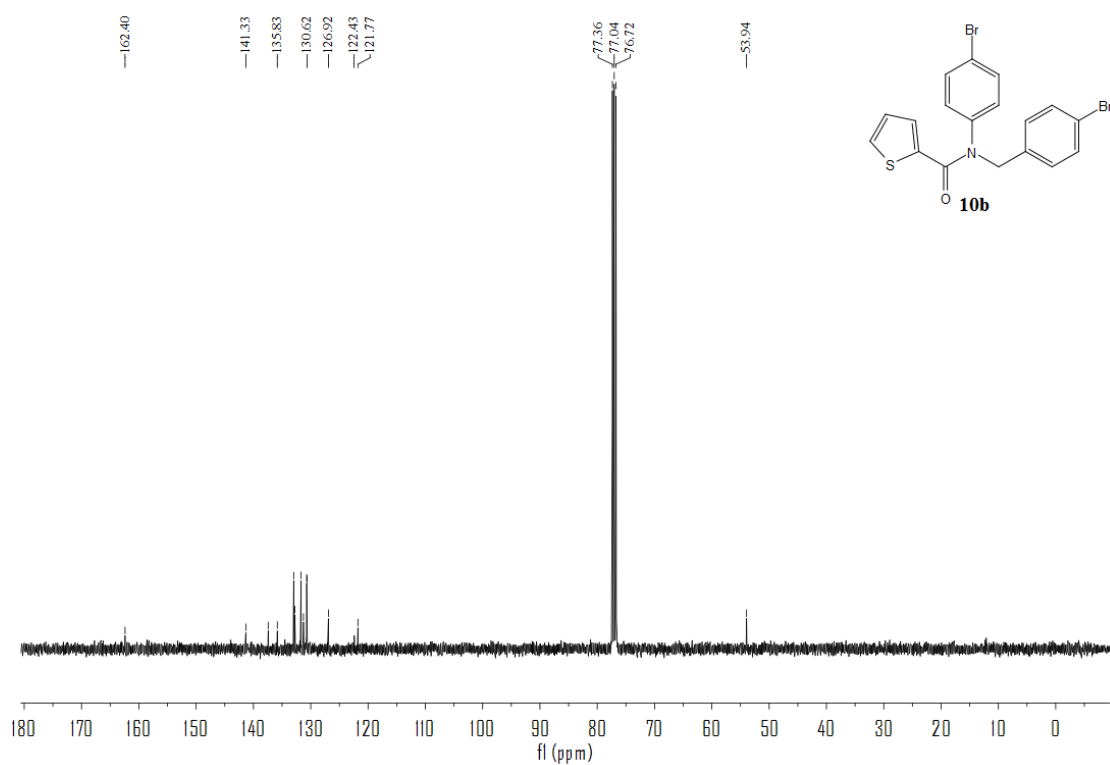

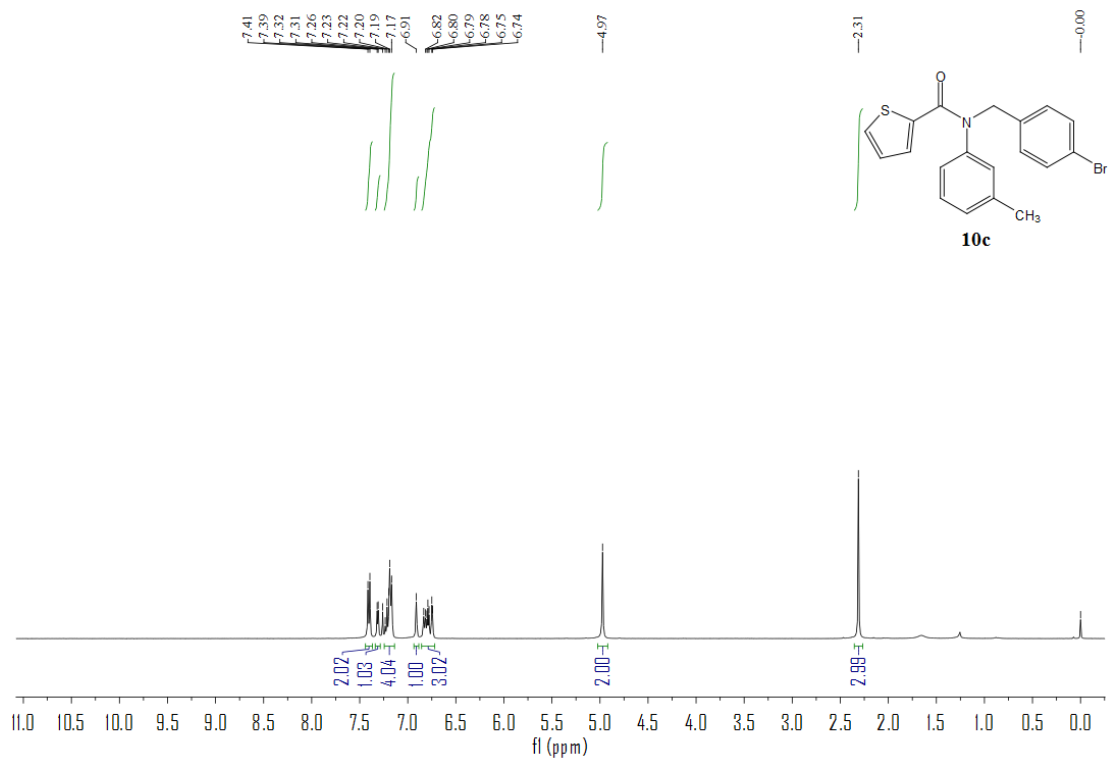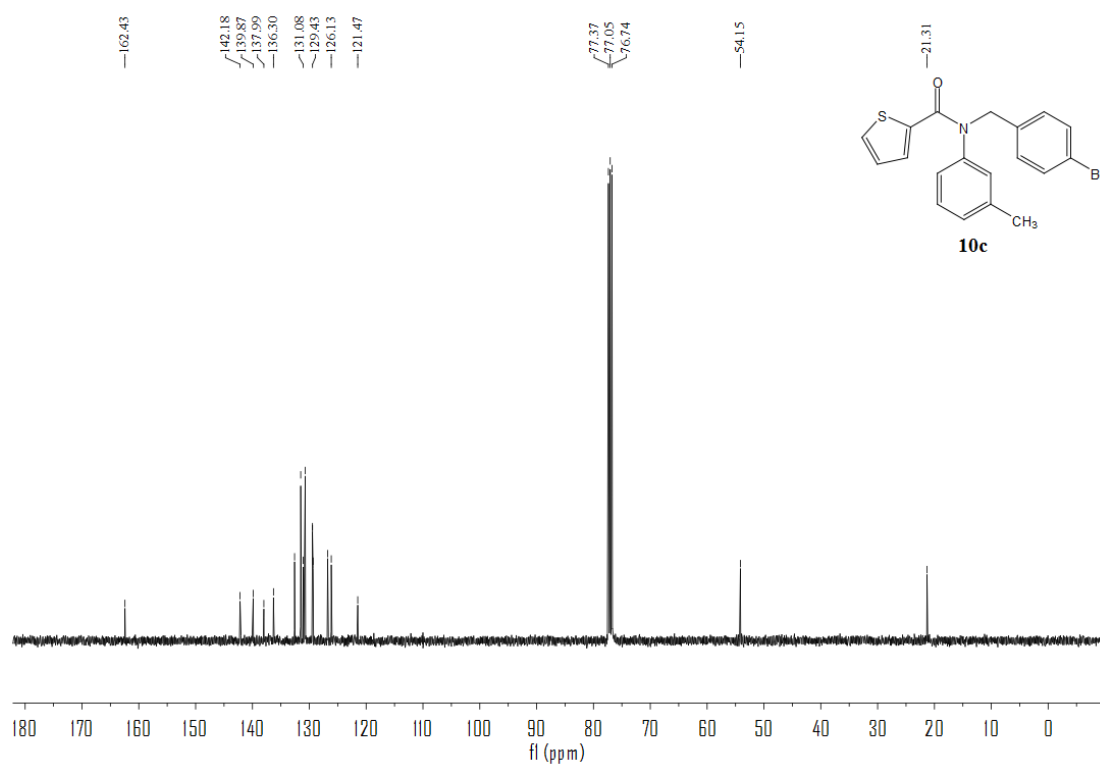

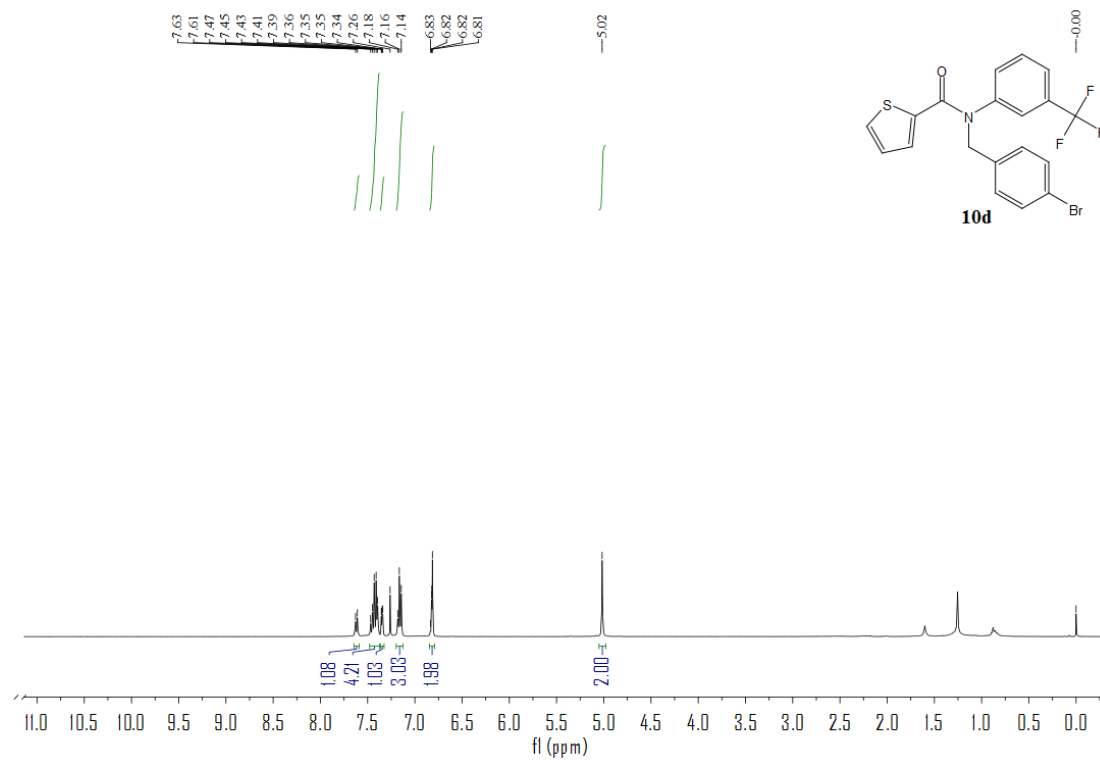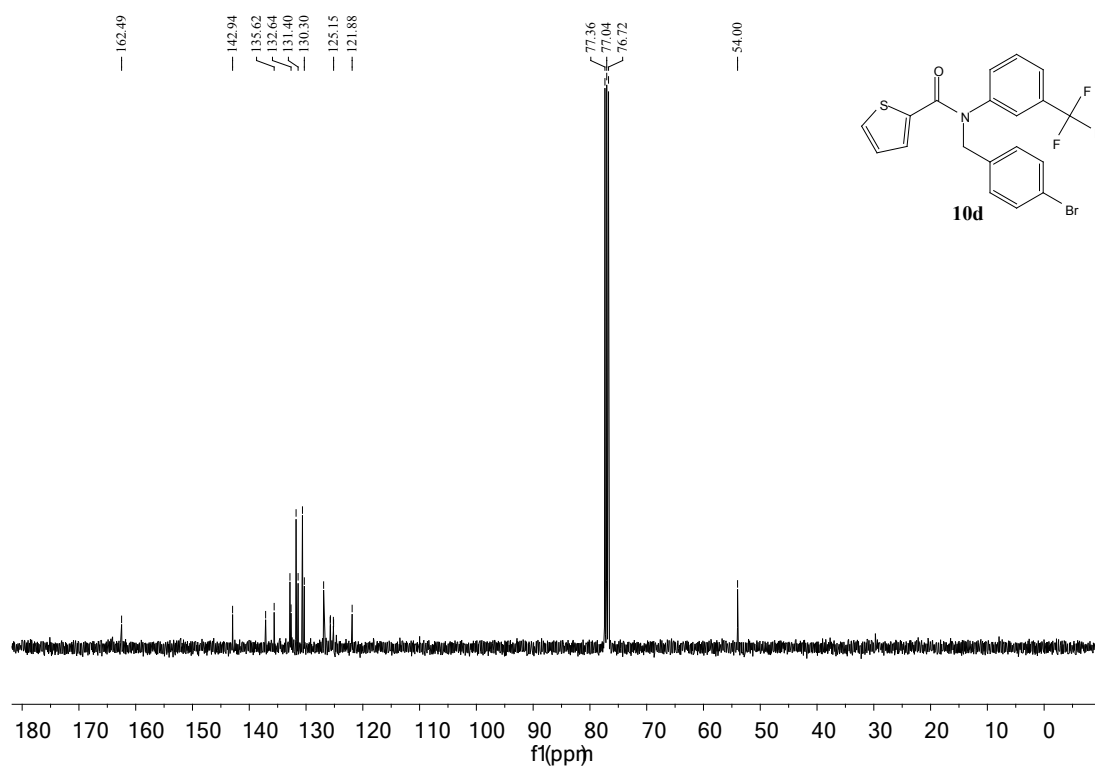

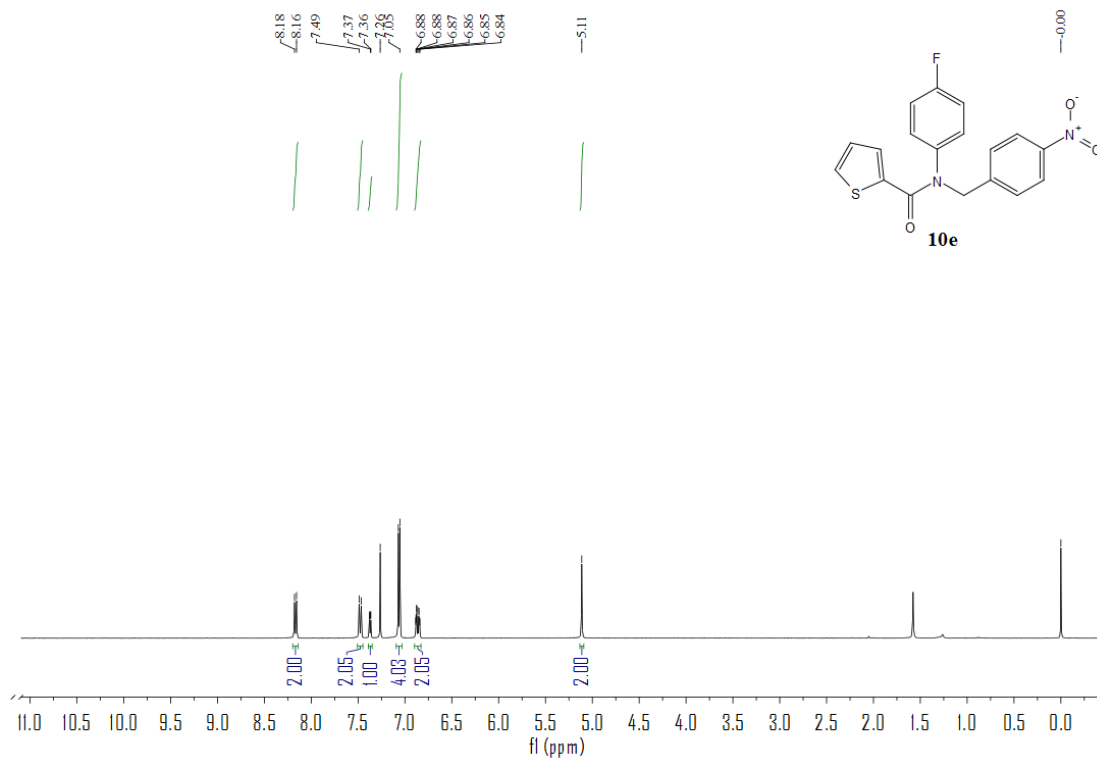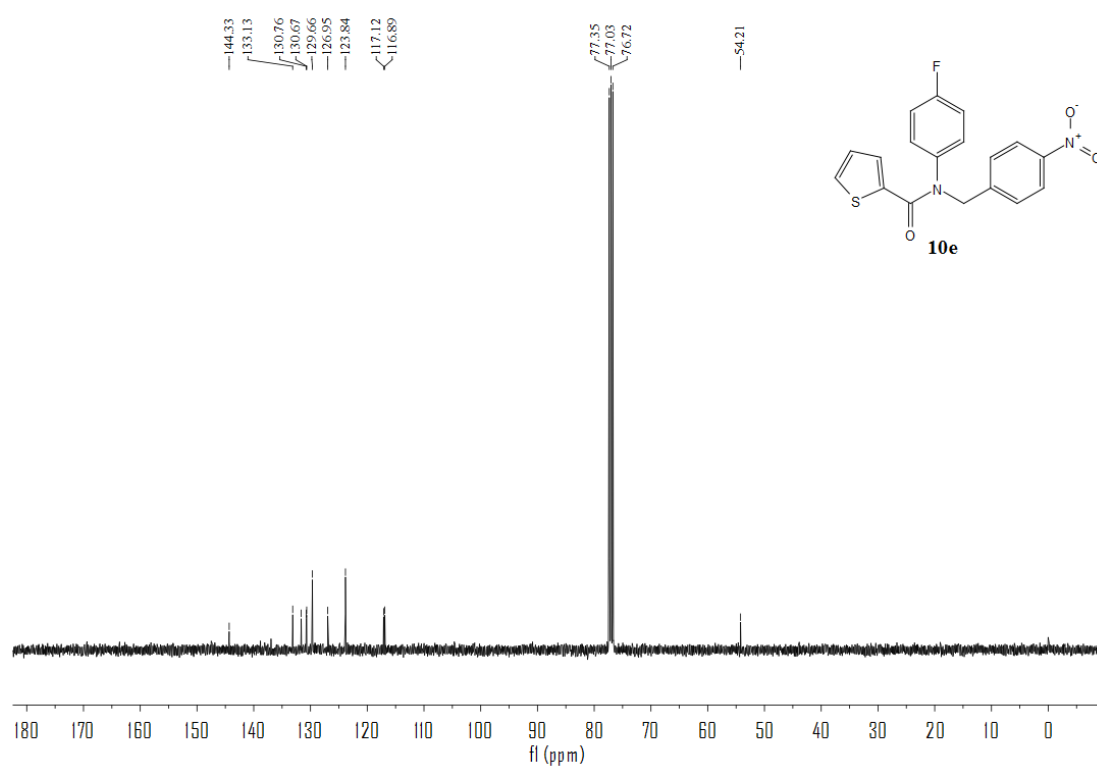

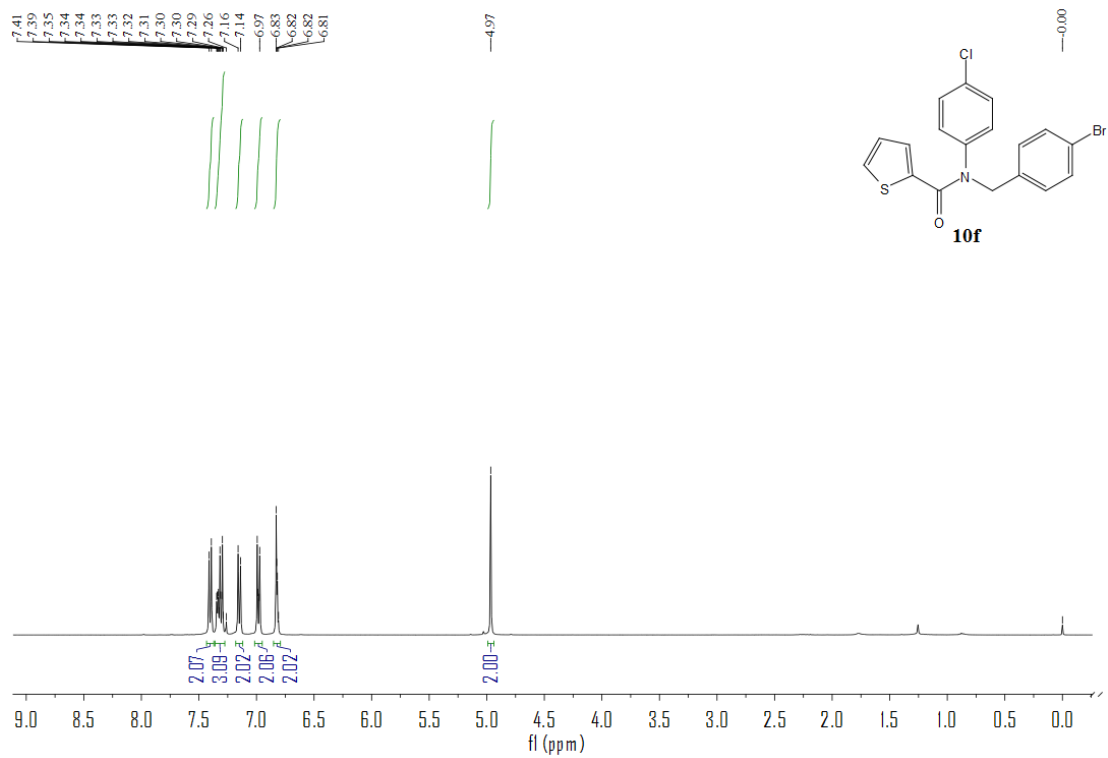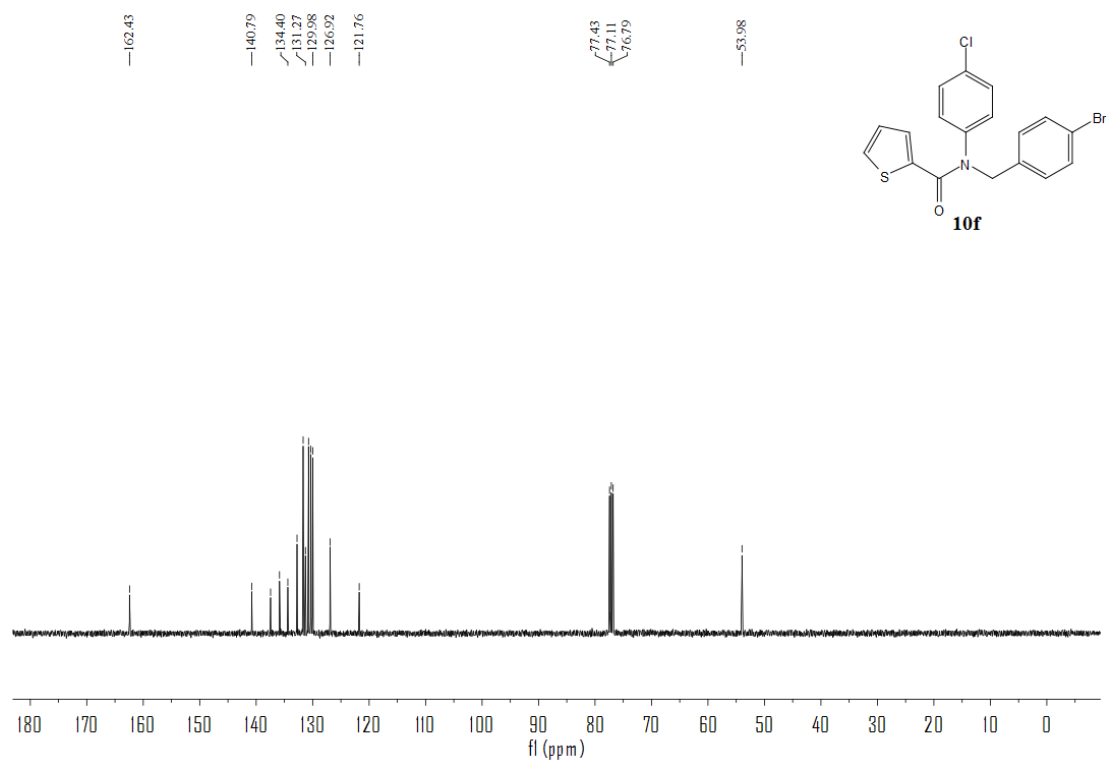

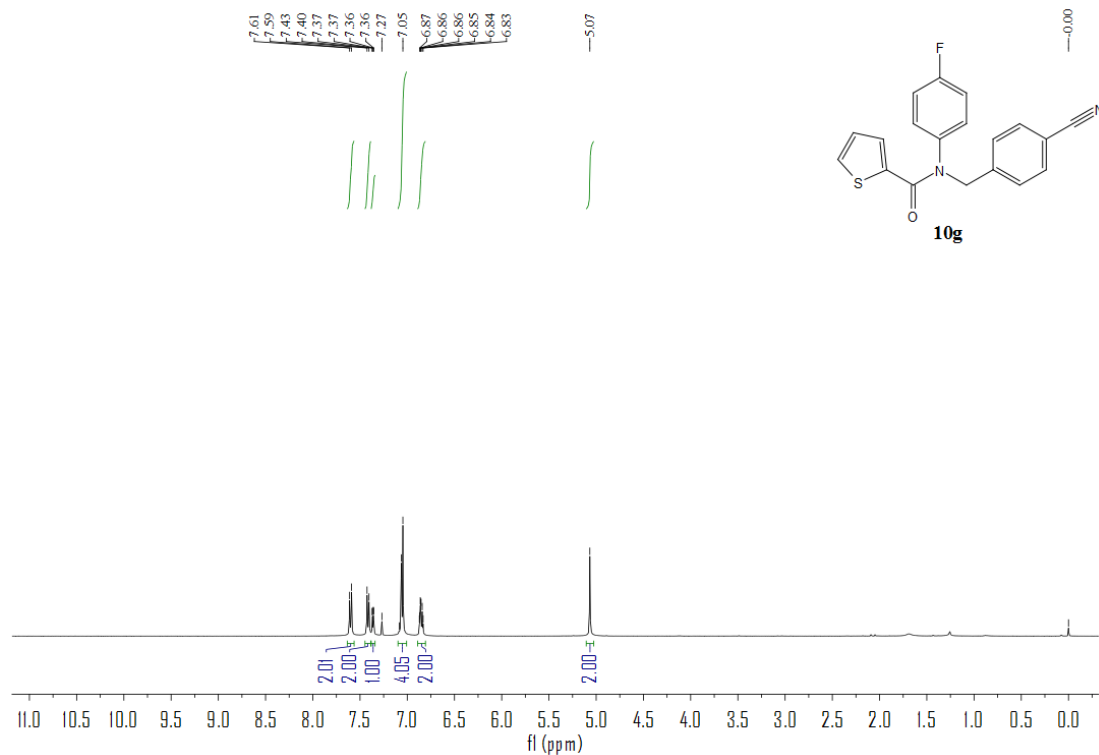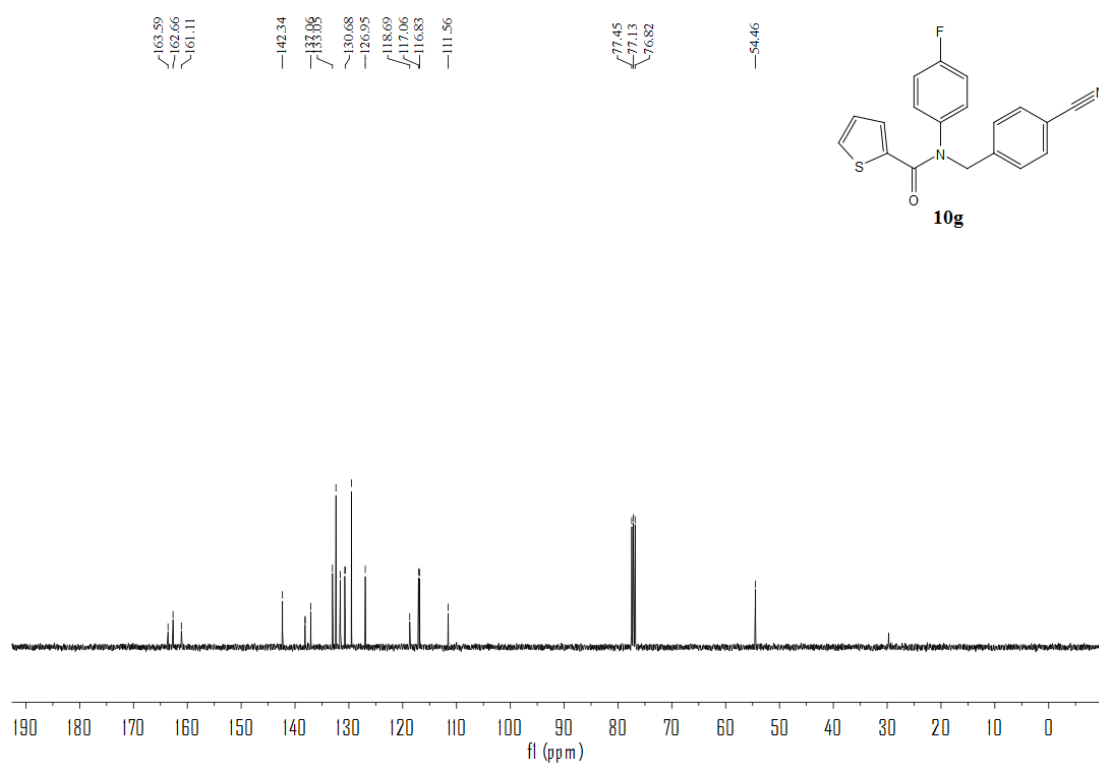

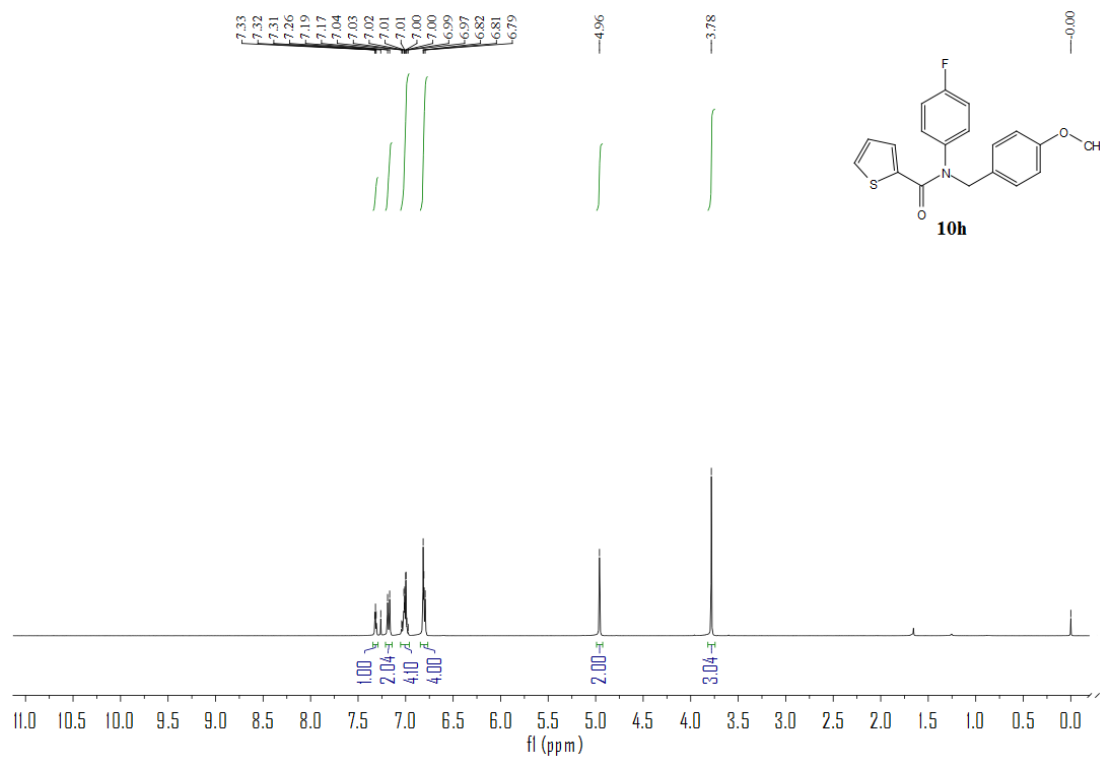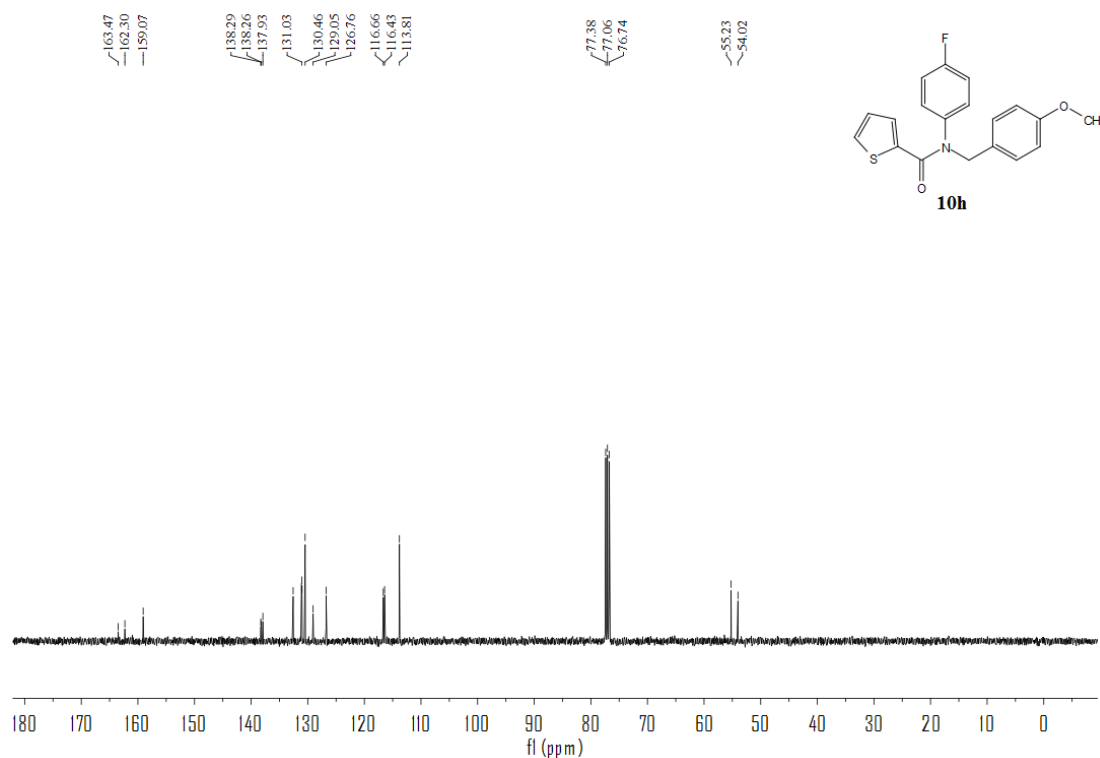

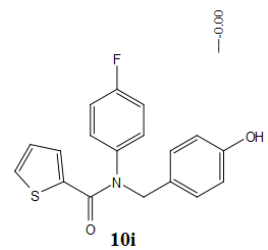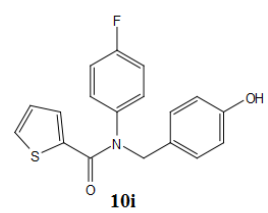



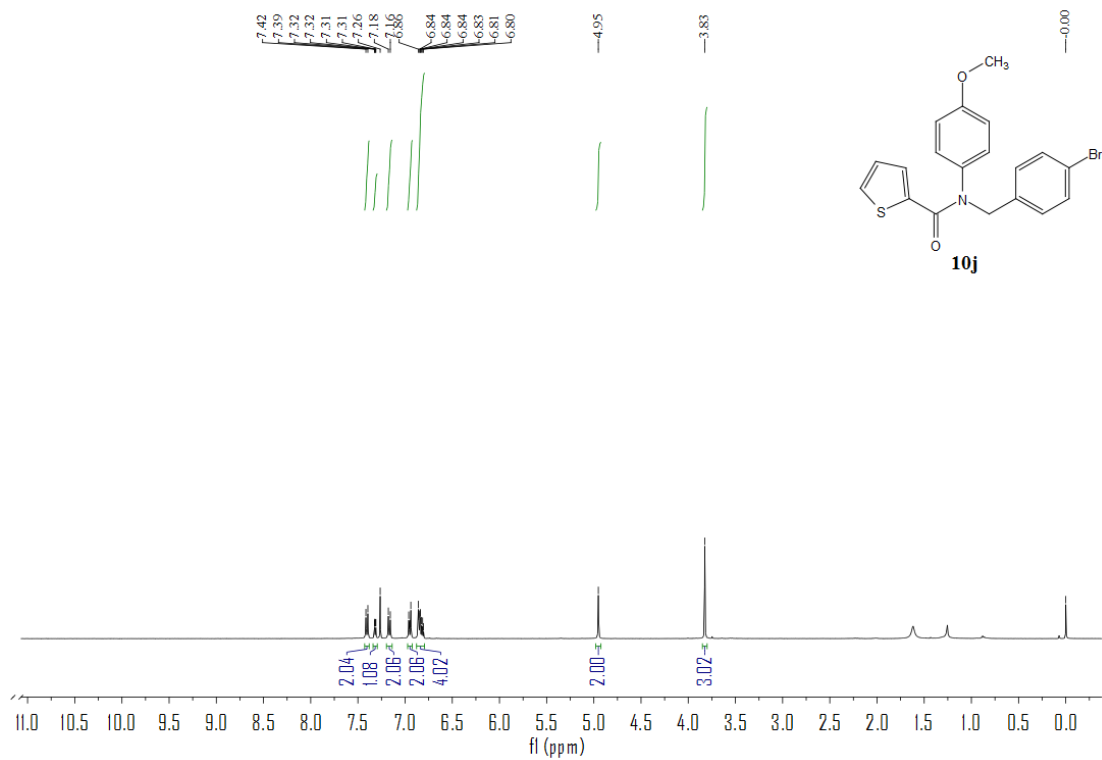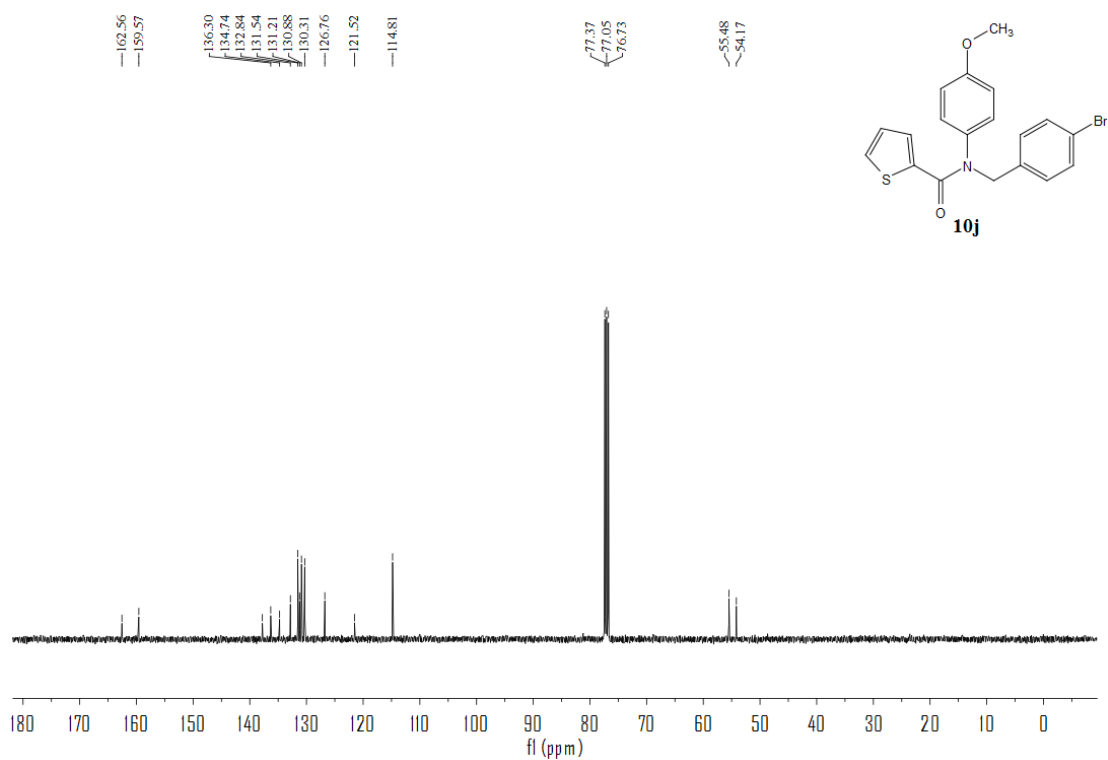

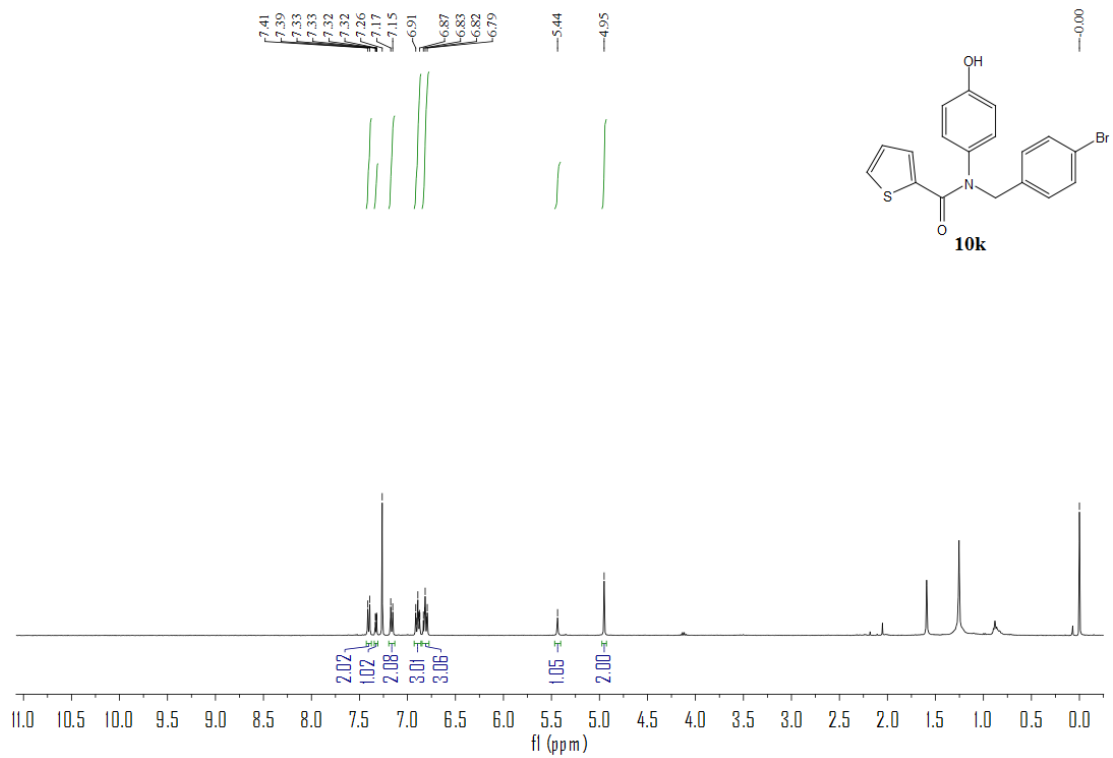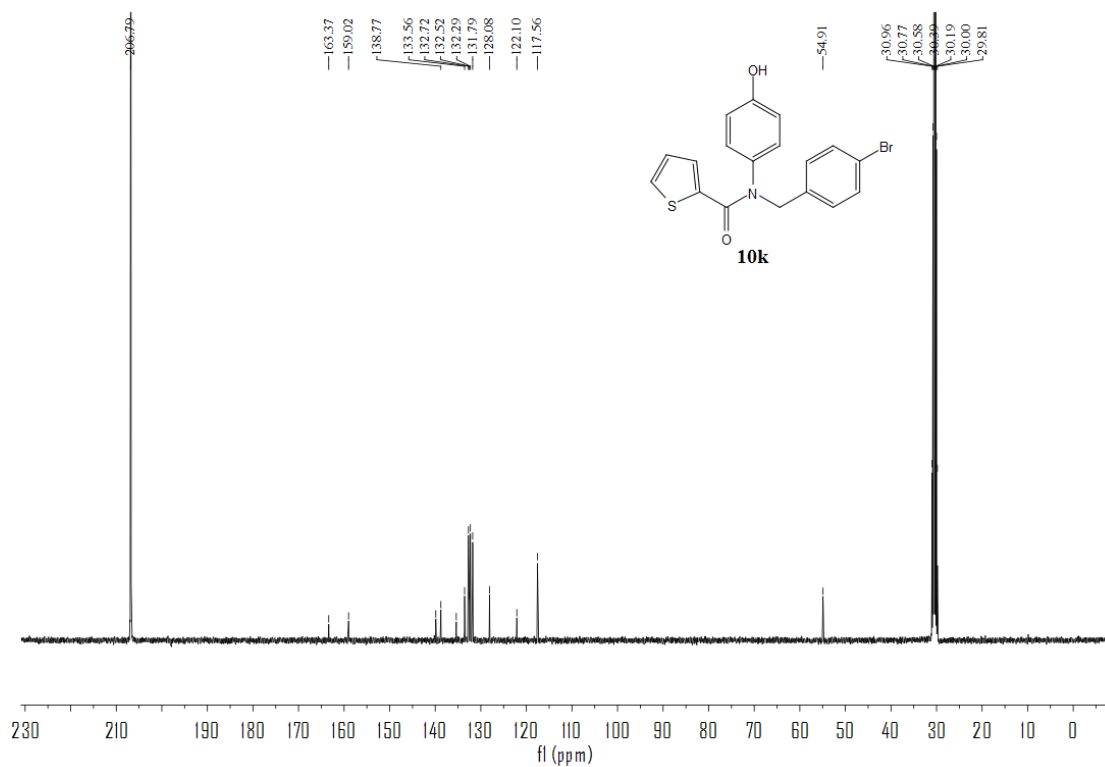

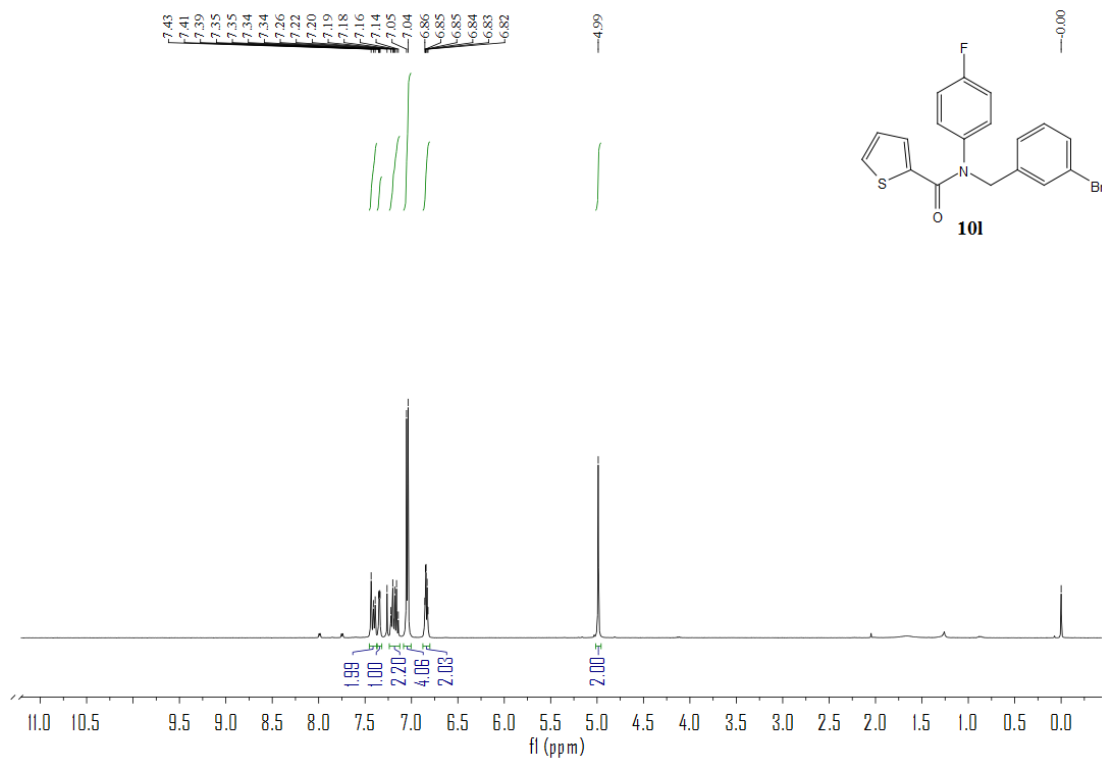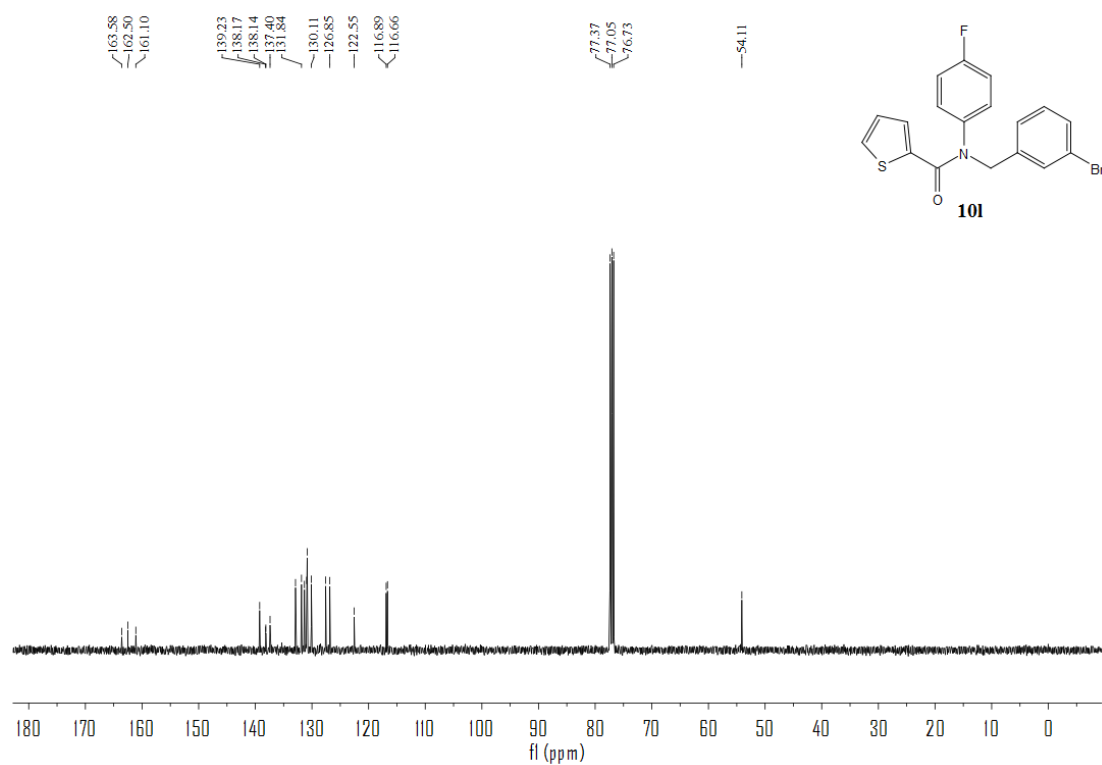

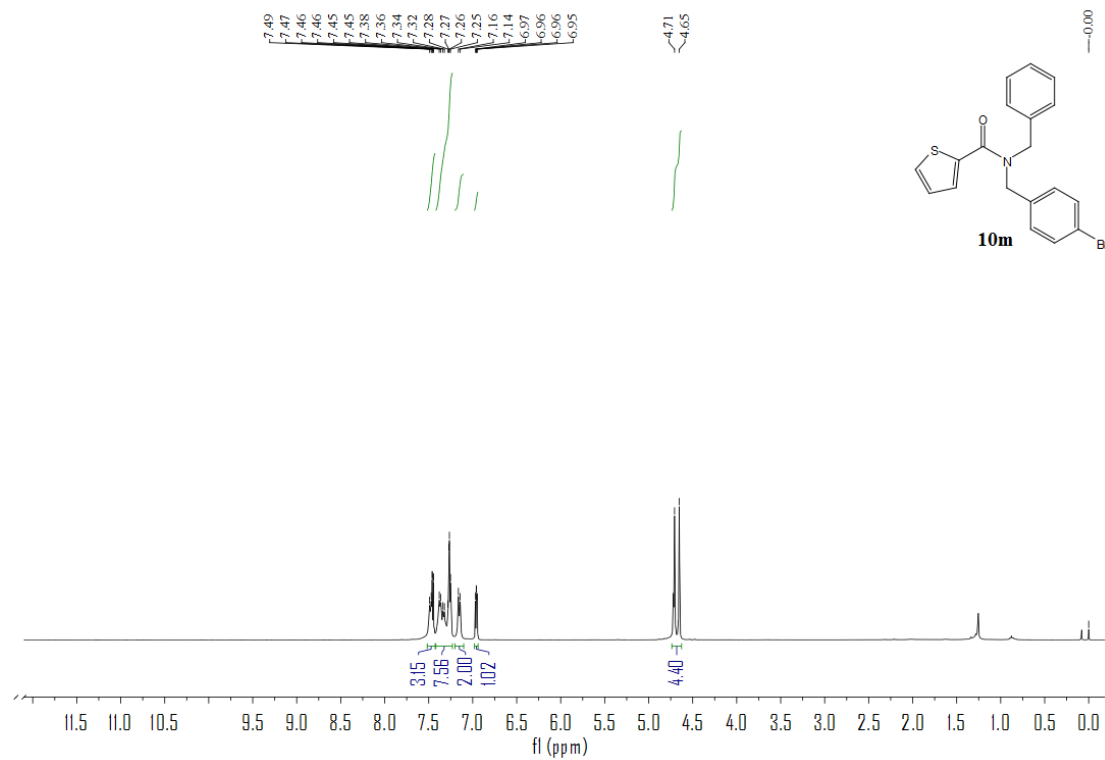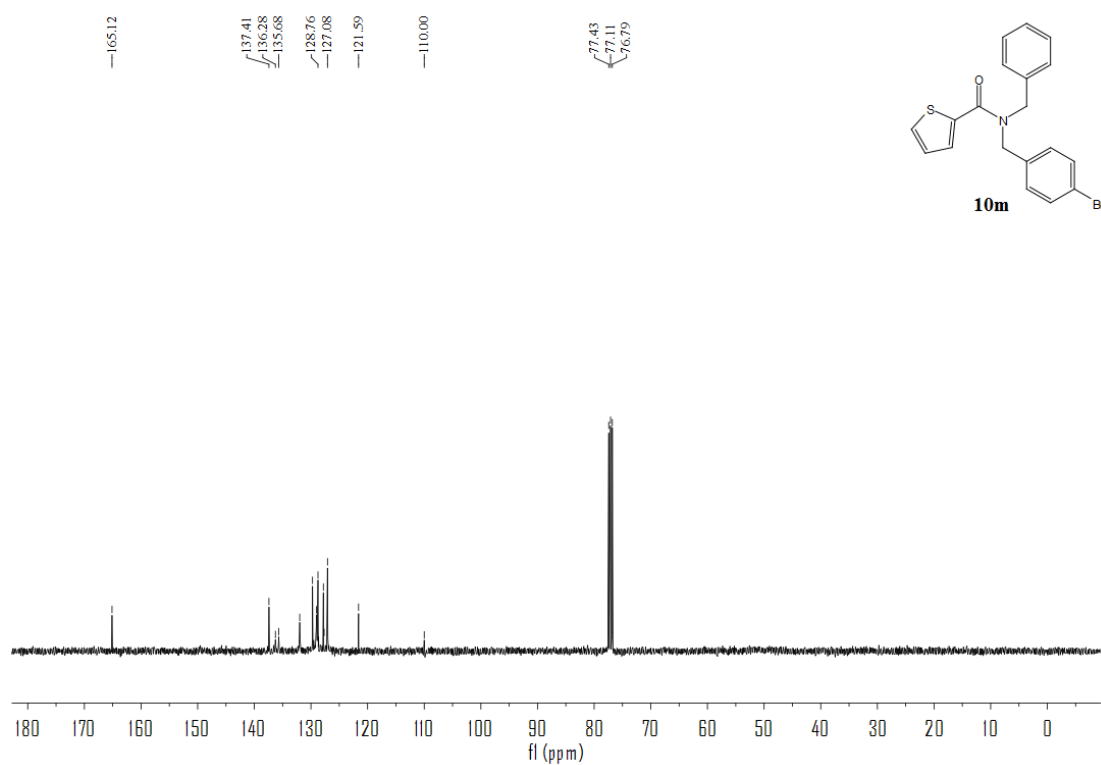

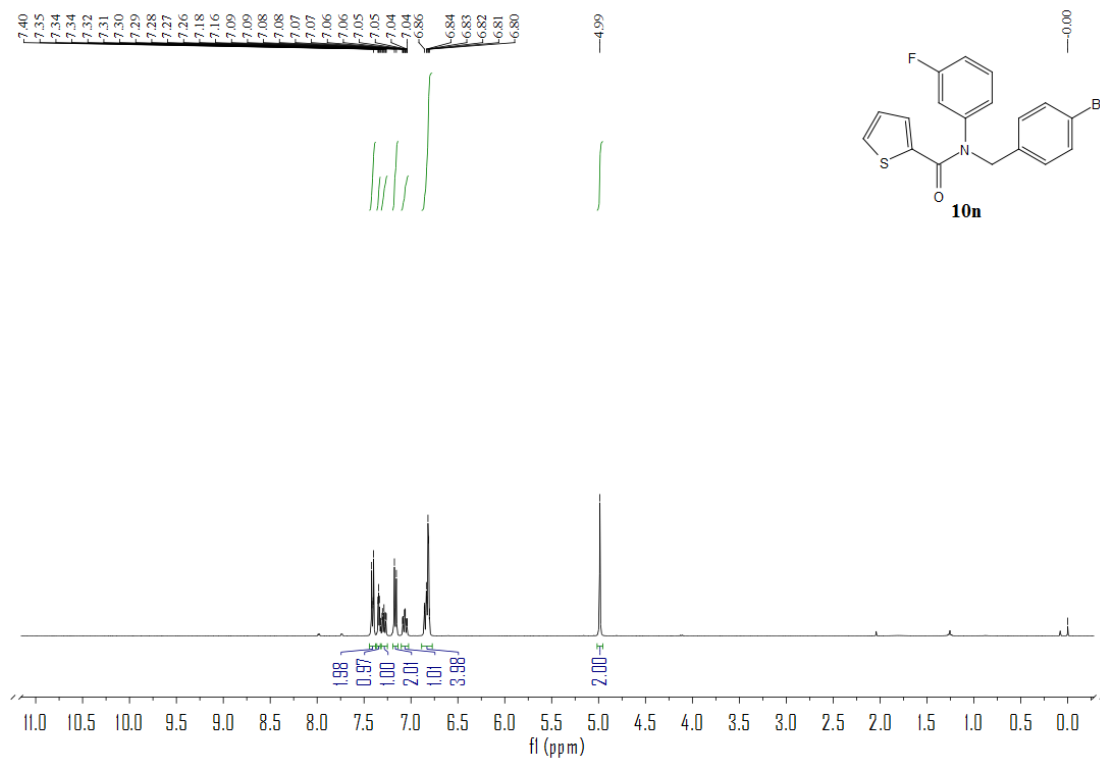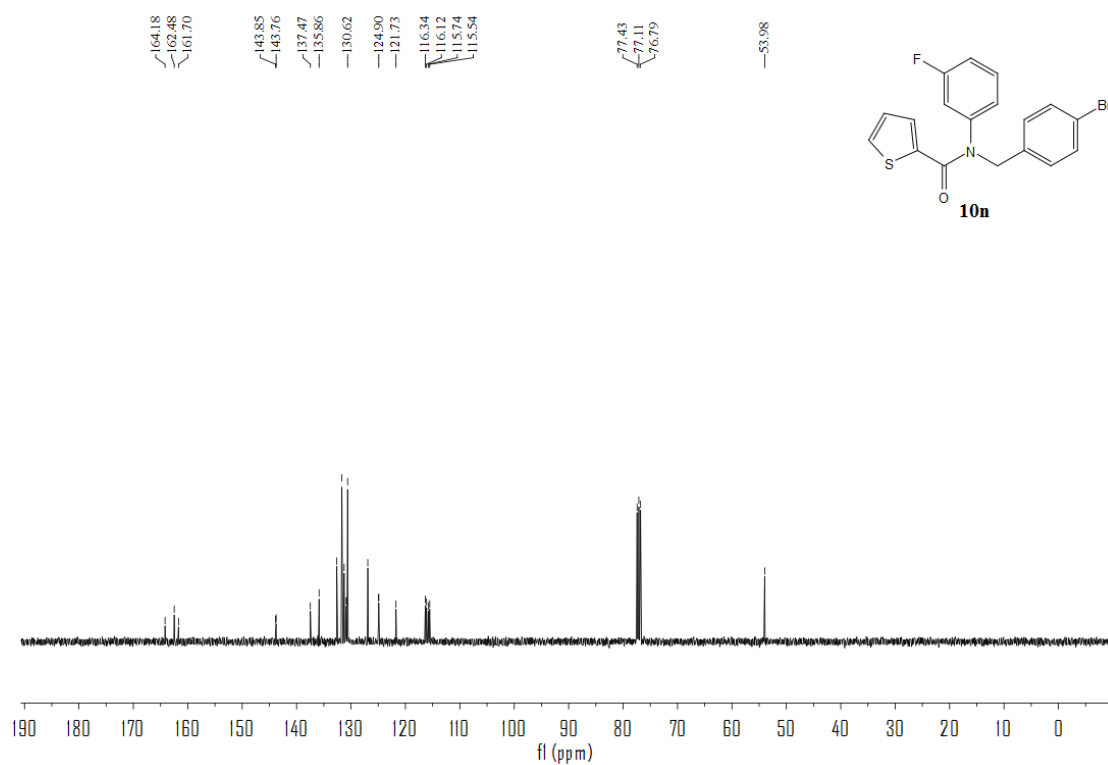

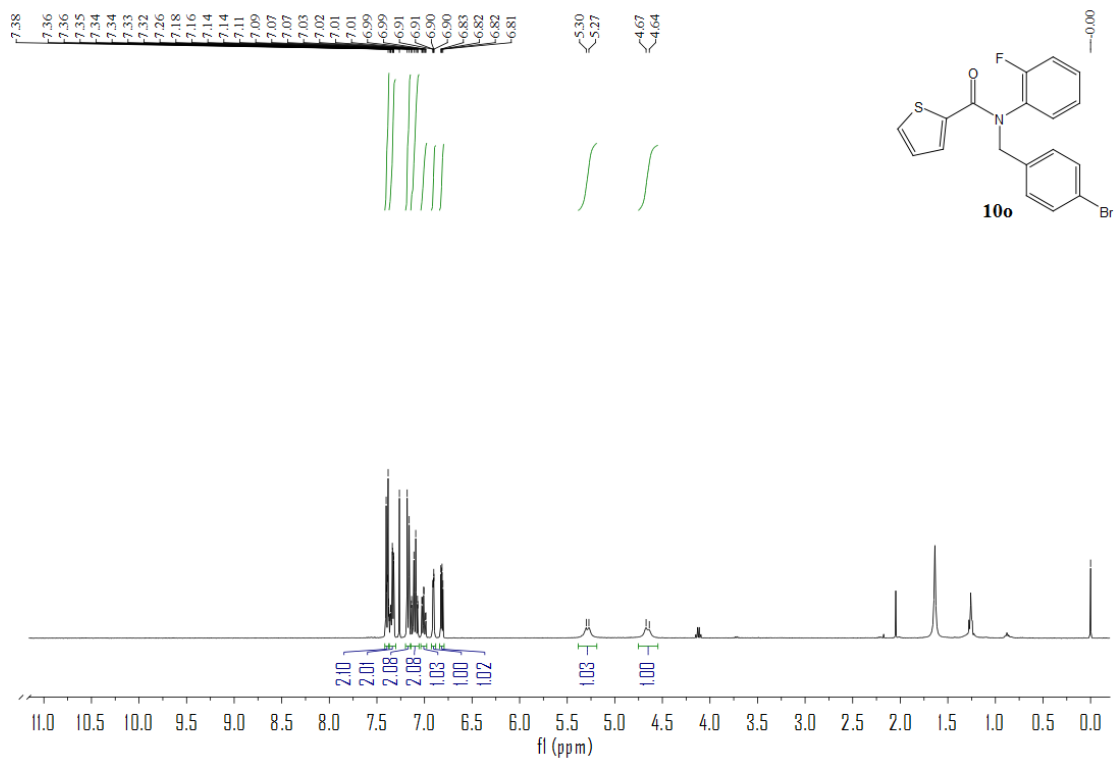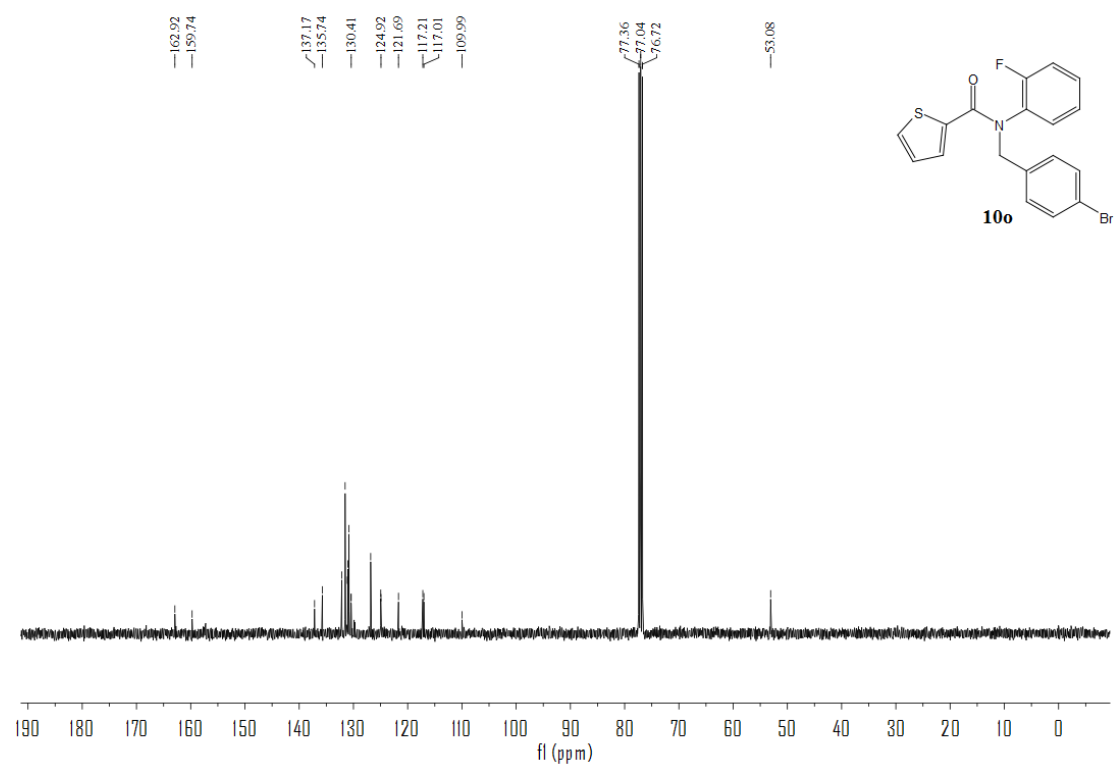

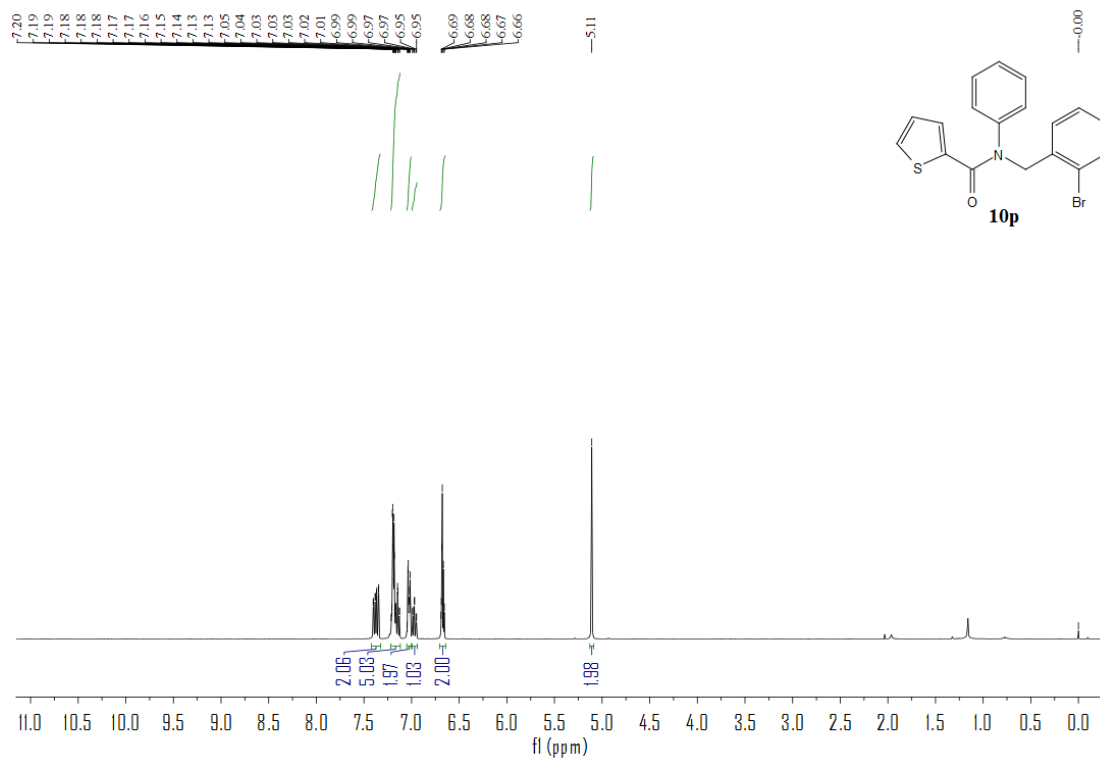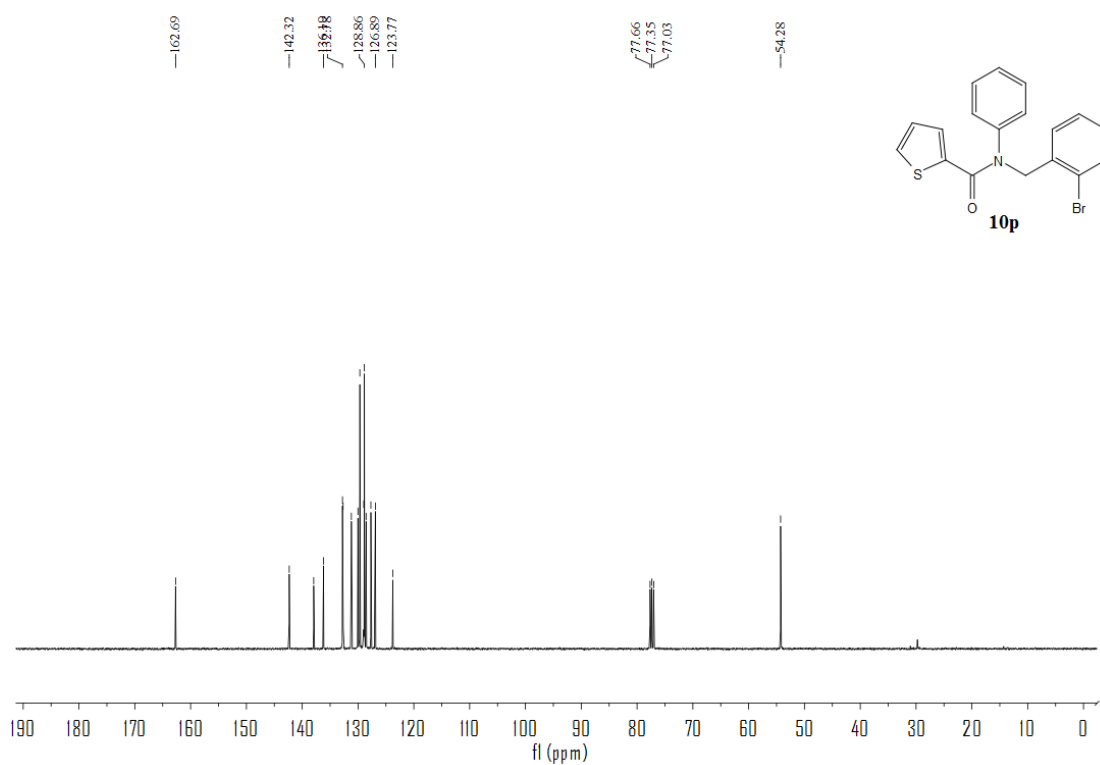

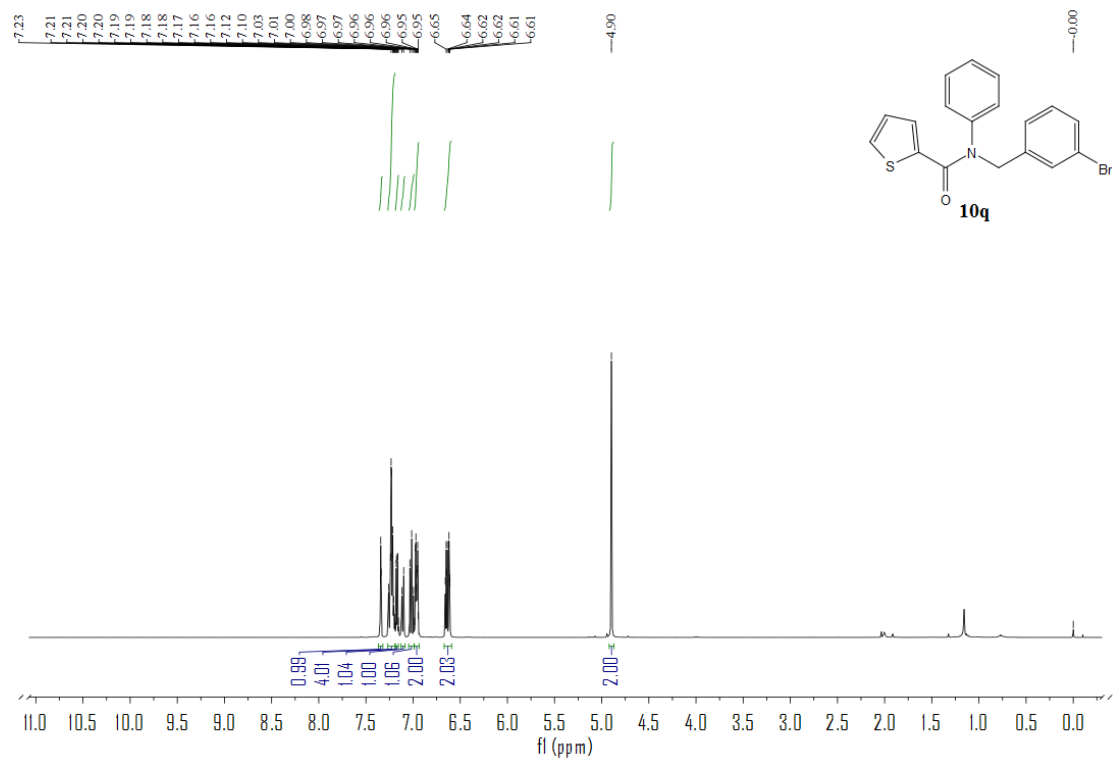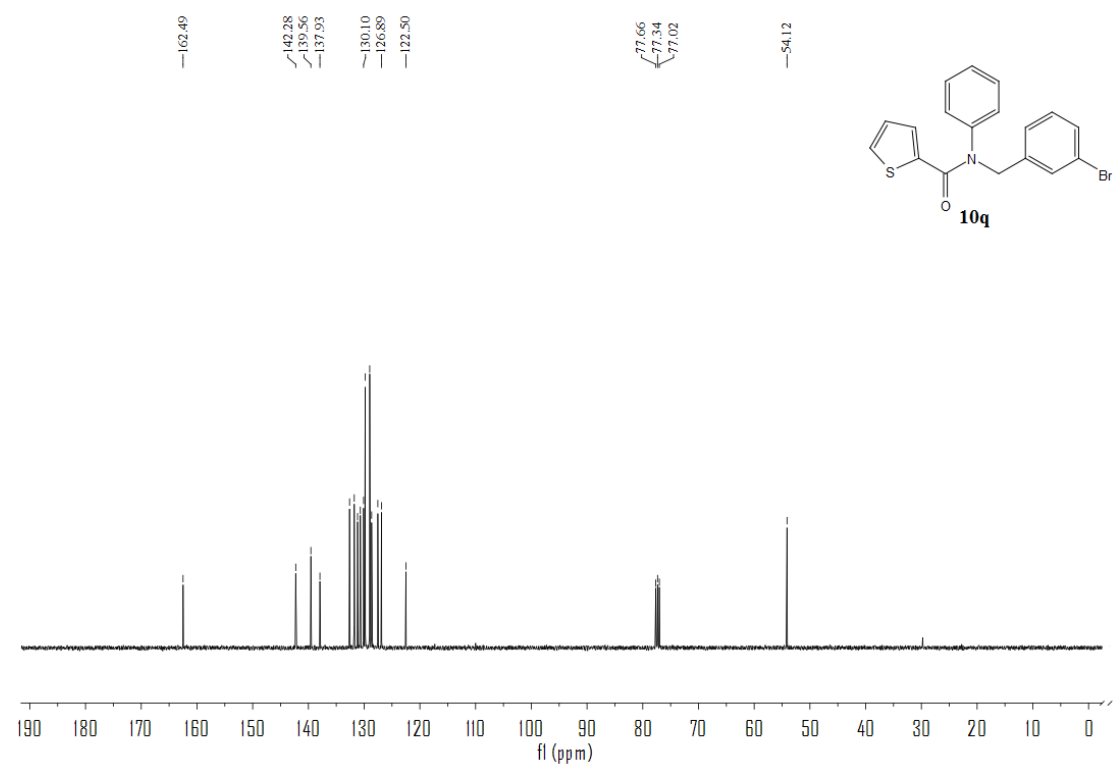



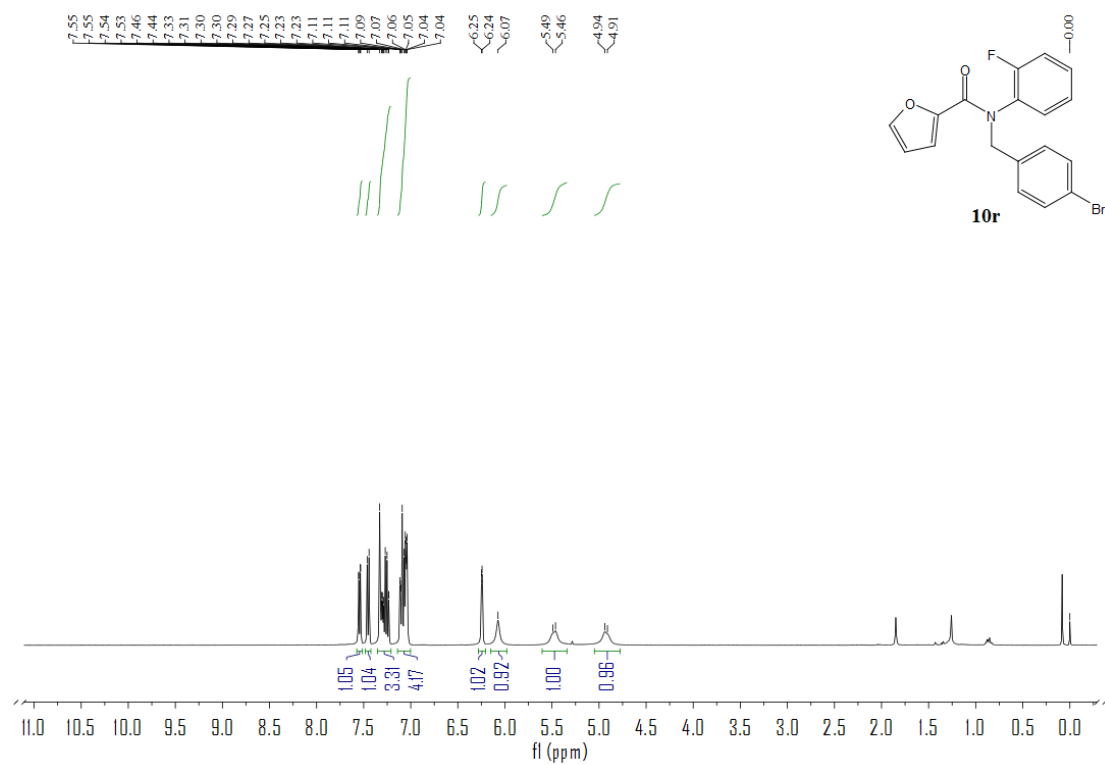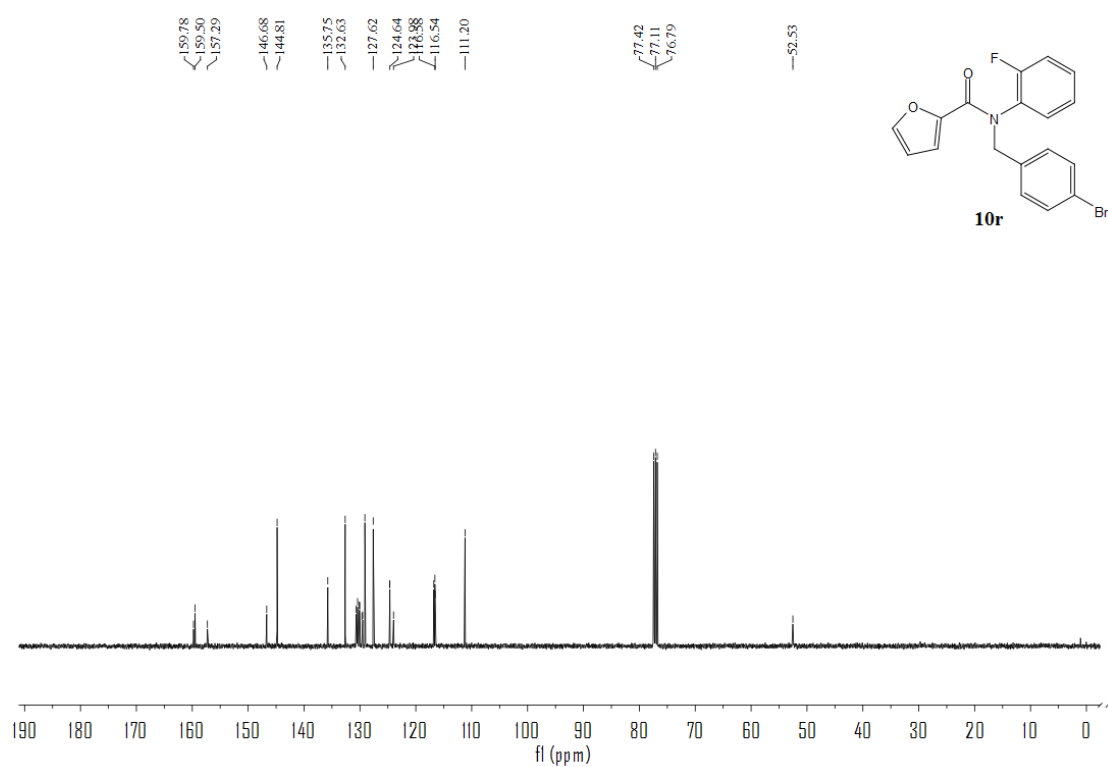

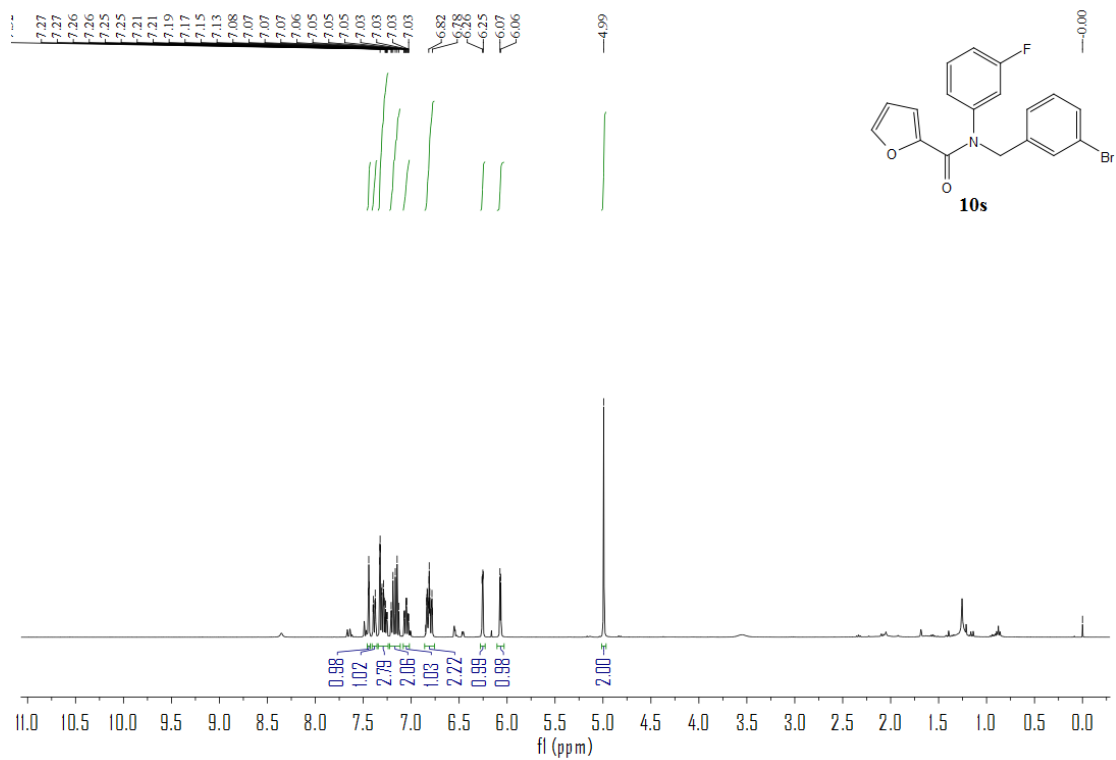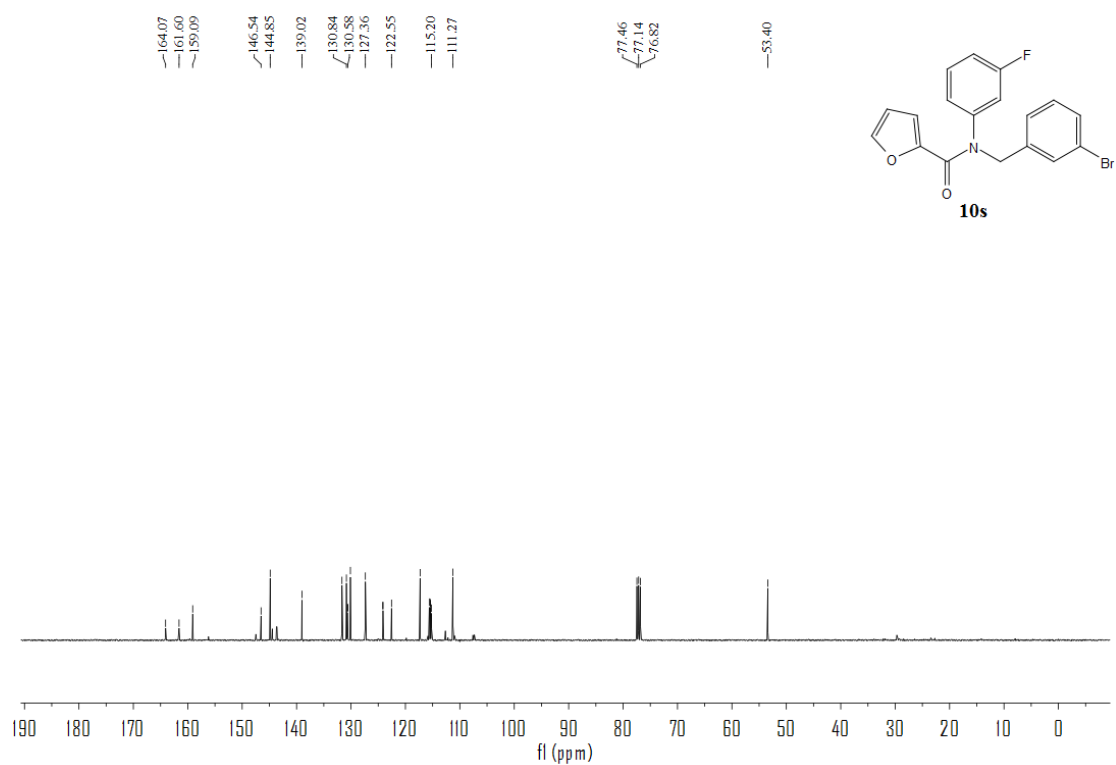

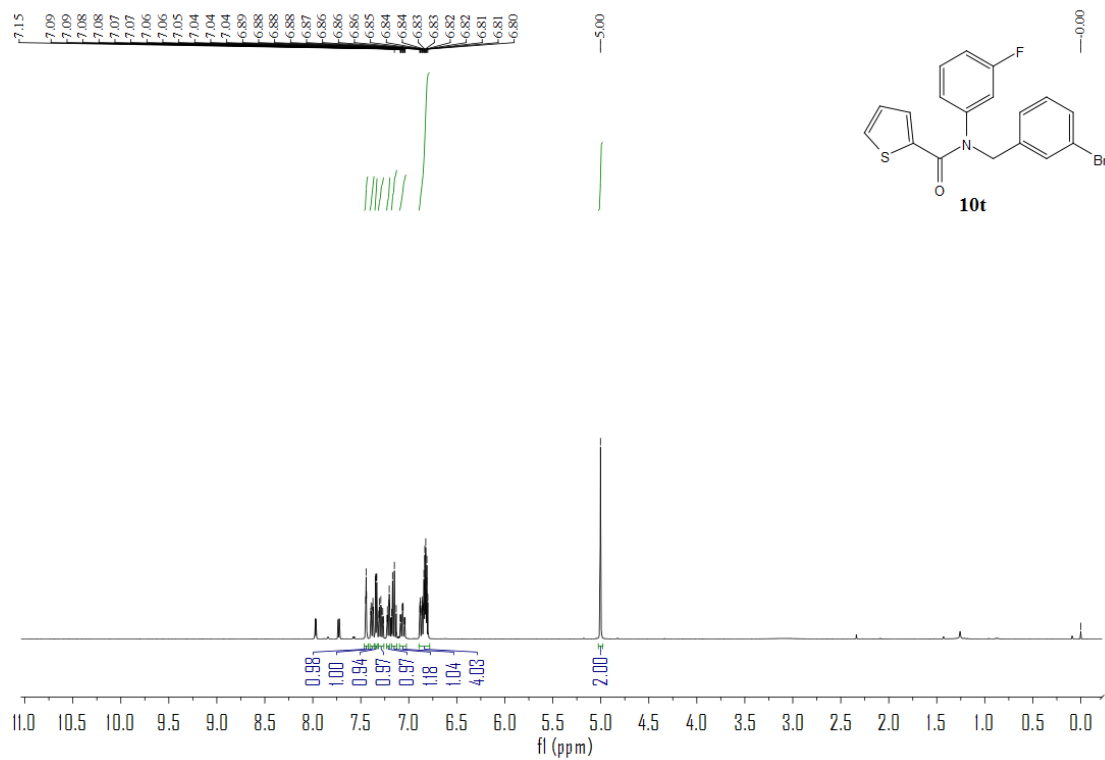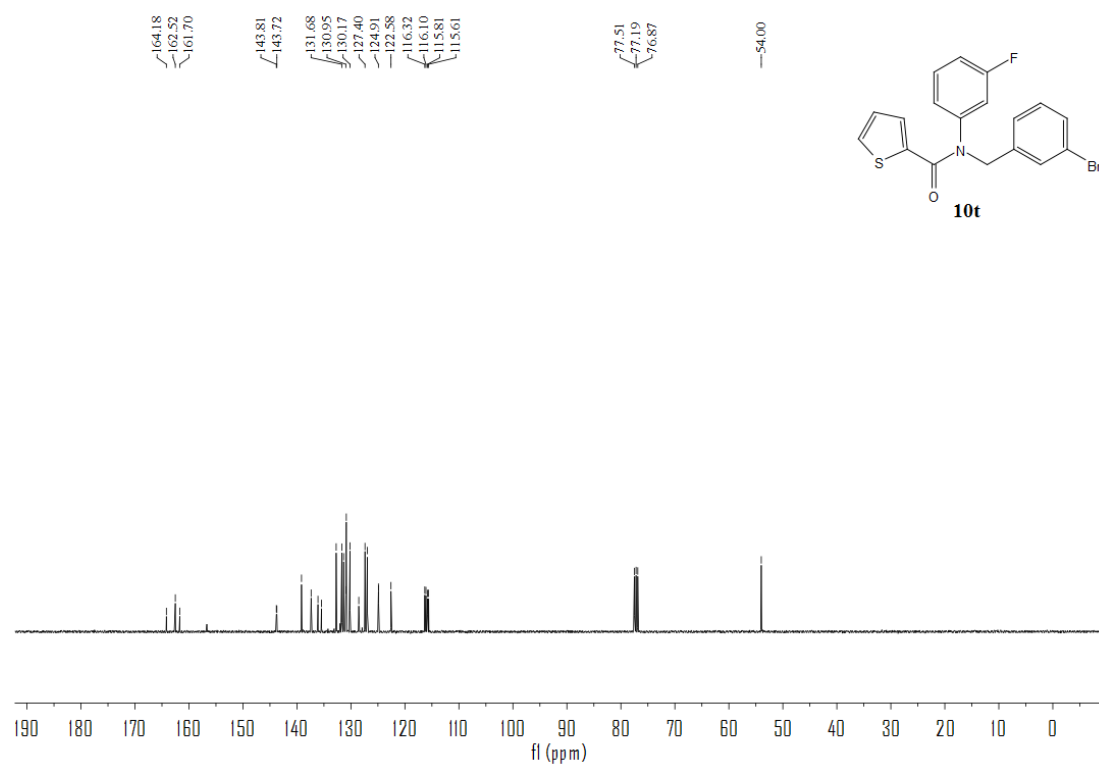

Supplement: c5ra07286g1.pdf [file c5ra07286g1.pdf]
